# Supplementary material for: Comparison of three common nutritional screening tools with the new European Society for Clinical Nutrition and Metabolism (ESPEN) criteria for malnutrition among patients with geriatric gastrointestinal cancer: a prospective study in China
Source: PubMed Central journal article supplement (PMC5898289; doi:10.1136/bmjopen-2017-019750), 2018-04-12
Supplement: bmjopen-2017-019750.draft_revisions.pdf [file bmjopen-2017-019750.draft_revisions.pdf]

# BMJ Open

BMJ Open is committed to open peer review. As part of this commitment we make the peer review history of every article we publish publicly available.

When an article is published we post the peer reviewers' comments and the authors' responses online. We also post the versions of the paper that were used during peer review. These are the versions that the peer review comments apply to.

The versions of the paper that follow are the versions that were submitted during the peer review process. They are not the versions of record or the final published versions. They should not be cited or distributed as the published version of this manuscript.

BMJ Open is an open access journal and the full, final, typeset and author-corrected version of record of the manuscript is available on our site with no access controls, subscription charges or pay-per-view fees (<http://bmjopen.bmj.com>).

If you have any questions on BMJ Open's open peer review process please email [info.bmjopen@bmj.com](mailto:info.bmjopen@bmj.com)

# BMJ Open

## Three common nutritional screening tools in the light of the new ESPEN consensus definition of the diagnostic criteria for malnutrition among geriatric gastrointestinal cancer patients

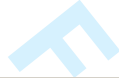

|                                 |                                                                                                                                                                                                                                                                                                                                                                                                                                                                                                                                                                                                                                                                                                                                                                                                                                                                                                                                                                                                                                                                                                                                                                                                                                                            |
|---------------------------------|------------------------------------------------------------------------------------------------------------------------------------------------------------------------------------------------------------------------------------------------------------------------------------------------------------------------------------------------------------------------------------------------------------------------------------------------------------------------------------------------------------------------------------------------------------------------------------------------------------------------------------------------------------------------------------------------------------------------------------------------------------------------------------------------------------------------------------------------------------------------------------------------------------------------------------------------------------------------------------------------------------------------------------------------------------------------------------------------------------------------------------------------------------------------------------------------------------------------------------------------------------|
| Journal:                        | <i>BMJ Open</i>                                                                                                                                                                                                                                                                                                                                                                                                                                                                                                                                                                                                                                                                                                                                                                                                                                                                                                                                                                                                                                                                                                                                                                                                                                            |
| Manuscript ID                   | bmjopen-2017-019750                                                                                                                                                                                                                                                                                                                                                                                                                                                                                                                                                                                                                                                                                                                                                                                                                                                                                                                                                                                                                                                                                                                                                                                                                                        |
| Article Type:                   | Research                                                                                                                                                                                                                                                                                                                                                                                                                                                                                                                                                                                                                                                                                                                                                                                                                                                                                                                                                                                                                                                                                                                                                                                                                                                   |
| Date Submitted by the Author:   | 25-Sep-2017                                                                                                                                                                                                                                                                                                                                                                                                                                                                                                                                                                                                                                                                                                                                                                                                                                                                                                                                                                                                                                                                                                                                                                                                                                                |
| Complete List of Authors:       | Ye, Xiao-Jun; Shanghai Tenth People's Hospital Affiliated to Tongji University, Department of Gastrointestinal Surgery; Medical College of Soochow University, Department of Medicine<br>Ji, Yan-Bin; Shanghai Tenth People's Hospital Affiliated to Tongji University, Department of Gastrointestinal Surgery; Shanghai Clinical Institution, Anhui Medical University, Department of Gastrointestinal Surgery<br>Ma, Bing-Wei; Shanghai Tenth People's Hospital Affiliated to Tongji University, Department of Gastrointestinal Surgery<br>Huang, Dong-Dong; Shanghai Tenth People's Hospital Affiliated to Tongji University, Department of Gastrointestinal Surgery<br>Chen, Wei-Zhe; The First Affiliated Hospital, Wenzhou Medical University, Department of Gastrointestinal Surgery<br>Pan, Zong-You; School of Medicine, Zhejiang University, Department of Sports Medicine<br>Shen, Xian; The Second Affiliated Hospital, Wenzhou Medical University, Department of Gastrointestinal Surgery<br>Zhuang, Cheng-Le; Shanghai Tenth People's Hospital Affiliated to Tongji University, Department of Gastrointestinal Surgery<br>Yu, Zhen; Shanghai Tenth People's Hospital Affiliated to Tongji University, Department of Gastrointestinal Surgery |
| <b>Primary Subject Heading</b>: | Gastroenterology and hepatology                                                                                                                                                                                                                                                                                                                                                                                                                                                                                                                                                                                                                                                                                                                                                                                                                                                                                                                                                                                                                                                                                                                                                                                                                            |
| Secondary Subject Heading:      | Nutrition and metabolism, Oncology                                                                                                                                                                                                                                                                                                                                                                                                                                                                                                                                                                                                                                                                                                                                                                                                                                                                                                                                                                                                                                                                                                                                                                                                                         |
| Keywords:                       | Malnutrition, nutritional screening tools, ESPEN diagnostic criteria, gastrointestinal cancer, elderly                                                                                                                                                                                                                                                                                                                                                                                                                                                                                                                                                                                                                                                                                                                                                                                                                                                                                                                                                                                                                                                                                                                                                     |
|                                 |                                                                                                                                                                                                                                                                                                                                                                                                                                                                                                                                                                                                                                                                                                                                                                                                                                                                                                                                                                                                                                                                                                                                                                                                                                                            |

SCHOLARONE™  
Manuscripts

1  
2  
3  
4 **Three common nutritional screening tools in the light of the new**  
5  
6 **ESPEN consensus definition of the diagnostic criteria for**  
7  
8 **malnutrition among geriatric gastrointestinal cancer patients**  
9  
10

11  
12  
13 Xiao-Jun Ye, MD<sup>1,5¶</sup>, Yan-Bin Ji, MD<sup>1,6¶</sup>, Bing-Wei Ma, MD<sup>1</sup>,  
14 Dong-Dong Huang, MD<sup>1</sup>, Wei-Zhe Chen, MD<sup>2</sup>, Zong-You Pan, MD<sup>3</sup>,  
15 Xian Shen, MD, PhD<sup>4</sup>, Cheng-Le Zhuang, MD, PhD<sup>1\*</sup>, and Zhen Yu, MD,  
16 PhD<sup>1,2\*</sup>  
17  
18  
19  
20  
21  
22  
23  
24  
25

26 <sup>1</sup> Department of Gastrointestinal Surgery, Shanghai Tenth People's  
27 Hospital Affiliated to Tongji University, Shanghai, China;  
28

29 <sup>2</sup> Department of Gastrointestinal Surgery, The First Affiliated Hospital,  
30 Wenzhou Medical University, Wenzhou, Zhejiang, China;  
31  
32  
33

34 <sup>3</sup> Department of Sports Medicine, School of Medicine, Zhejiang  
35 University, Hangzhou, Zhejiang, China;  
36  
37  
38

39 <sup>4</sup> Department of Gastrointestinal Surgery, The Second Affiliated Hospital,  
40 Wenzhou Medical University, Wenzhou, Zhejiang, China;  
41  
42  
43  
44

45 <sup>5</sup> Medical College of Soochow University, Suzhou, Jiangsu, China;  
46  
47

48 <sup>6</sup> Department of Gastrointestinal Surgery, Shanghai Clinical Institution,  
49 Anhui Medical University, Shanghai, China.  
50  
51  
52  
53  
54  
55

56 ¶These authors contributed equally to this work.  
57  
58  
59  
60

1  
2  
3  
4  
5  
6 \* Corresponding author:  
7

8  
9 E-mail: [yuzhen0577@gmail.com](mailto:yuzhen0577@gmail.com) (YZ); [zhuangchengle@126.com](mailto:zhuangchengle@126.com) (ZCL).  
10  
11

12  
13  
14 **Correspondence address:**

15  
16 Department of Gastrointestinal Surgery, Shanghai Tenth People's  
17  
18 Hospital affiliated to Tongji University, 301 Yanchang Road, Shanghai  
19  
20 200072, China  
21

22  
23  
24 Tel.: +86 02166307132; fax: +86 02159410409.  
25

26 **Funders:** This work was funded by the Science and Technology  
27  
28 Commission of Shanghai Municipality [grant number 16411954200]; and  
29  
30 Shanghai Municipal Commission of Health and Family Planning [grant  
31  
32 number 201640013].  
33  
34

35  
36 **All authors reported no biomedical financial interests or potential**  
37  
38 **conflicts of interest.**  
39  
40  
41  
42  
43  
44  
45  
46  
47  
48  
49  
50  
51  
52  
53  
54  
55  
56  
57  
58  
59  
60

## Abstract

Objective: The aim of this study was to evaluate and compare the three common nutritional screening tools with the new ESPEN diagnostic criteria for malnutrition among the elderly gastrointestinal cancer patients.

Research Methods & Procedures: Nutritional screening tools, including Nutritional Risk Screening 2002 (NRS 2002), Malnutrition Universal Screening Tool (MUST) and the Short Form of Mini Nutrition Assessment (MNA-SF), were applied to 255 patients with gastrointestinal cancer. We compared the diagnostic value of these tools for malnutrition, using the new ESPEN diagnostic criteria for malnutrition as the “gold standards”.

Results: According to the new ESPEN diagnostic criteria for malnutrition, 20.0% of the patients were diagnosed as malnourished. With the use of NRS 2002, 52.2% of the patients were found to be at high risk of malnutrition, with the use of MUST, 37.6% of the patients were found to be at moderate/high risk of malnutrition, and according to MNA-SF, 47.8% of the patients were found to be at nutritional risk. MUST was the best correlated with the ESPEN diagnostic criteria ( $K = 0.530$ ,  $p < 0.001$ ) compared with NRS 2002 ( $K = 0.312$ ,  $p < 0.001$ ) and MNA-SF ( $K = 0.380$ ,  $p < 0.001$ ). The ROC curve of MUST had the highest Area Under the Curve (AUC) compared with NRS 2002 and MNA-SF.

1  
2  
3  
4 Conclusions: MUST was found to perform the best to identify the  
5  
6 malnourished elderly gastrointestinal cancer patients distinguished by the  
7  
8 new ESPEN diagnostic criteria for malnutrition. Nevertheless, further  
9  
10 studies are needed to verify our findings.  
11  
12

13  
14 Keywords: Malnutrition, nutritional screening tools, ESPEN diagnostic  
15  
16 criteria, elderly, gastrointestinal cancer  
17  
18

### 19 **Strengths and limitations of this study**

- 20  
21 ● To our best knowledge, this is the first study to evaluate the three  
22  
23 screening tools in the specific geriatric gastrointestinal cancer  
24  
25 patients.  
26  
27
- 28  
29 ● We compared the diagnostic value of the three screening tools, using  
30  
31 the new ESPEN diagnostic criteria for malnutrition as the  
32  
33 “gold standards”.  
34  
35
- 36  
37 ● the sample size is relatively small. However, this study was conducted  
38  
39 in two centers with large surgical volume. To a certain extent, it  
40  
41 overcame the smallness of the sample size.  
42  
43  
44  
45  
46  
47  
48  
49  
50  
51  
52  
53  
54  
55  
56  
57  
58  
59  
60

## Introduction

As the life expectancy and world population ages increase, the proportion of elderly patients has been enlarged obviously. It is well known that the risk of cancer increases with age. More than half of the malignancies occur in people aged  $\geq 65$  years.[1, 2] Gastrointestinal cancer is one of the most common malignancies in the elderly,[3] and surgical excision remains the most effective therapy for gastrointestinal cancers.[4] Although the surgical techniques have been improved significantly, elderly gastrointestinal cancer patients still have a high frequency of complications and mortality.[4-8] This is partly due to the high prevalence of malnutrition, which is a common and serious problem in the elderly cancer patients.[9, 10, 11] Therefore, it is important to evaluate the nutritional risk of the geriatric gastrointestinal cancer patients before surgery.

To accurately assess the nutritional risk, it is important to choose an efficient nutritional screening tool. Although there are many widely used nutritional screening tools,[12] such as Nutritional Risk Screening 2002 (NRS 2002),[13] Malnutrition Universal Screening Tool (MUST)[14] and the Short Form of Mini Nutritional Assessment (MNA-SF),[15] it has not been established which is the most efficient and appropriate for nutritional screening in the elderly patients with gastrointestinal cancers.

1  
2  
3  
4 Moreover, there is a lack of universal definition of malnutrition, which  
5  
6 may lead to an inaccurate assessment and comparison of the nutritional  
7  
8 screening tools.  
9

10  
11 Recently, a diagnostic criteria for malnutrition has been proposed by  
12  
13 the ESPEN,[16] and it had been validated by some studies.[17, 18] As the  
14  
15 new criteria of defining malnutrition being proposed, it provides a  
16  
17 reference standard for the evaluation and comparison of the nutritional  
18  
19 screening tools. Therefore, our study was developed to evaluate the  
20  
21 consistency of the three common nutritional screening tools with the new  
22  
23 ESPEN diagnostic criteria for malnutrition and make a comparison of  
24  
25 them among geriatric gastrointestinal cancer patients.  
26  
27  
28  
29  
30  
31  
32  
33

## 34 **Materials and Methods**

### 35 **Patients**

36  
37  
38 Between January 2016 and May 2017, 255 patients who underwent  
39  
40 curative surgery for gastrointestinal cancer in two hospitals from  
41  
42 Shanghai and Wenzhou were included in this study. The inclusion criteria  
43  
44 included: (1) those underwent elective curative surgery for  
45  
46 gastrointestinal cancer; (2) those aged  $\geq 70$  years; (3) those signed the  
47  
48 informed consent and agreed to participate in this study. The exclusion  
49  
50 criteria included: (1) those performed a palliative or emergency operation;  
51  
52  
53  
54  
55  
56  
57  
58  
59  
60 (2) those aged  $< 70$  years; (3) those cannot be assessed by NRS 2002,



1  
2  
3  
4 MUST and MNA-SF for the difficulty of data collection; (4) those  
5  
6 refused to take part in this study.  
7

8  
9 This study was approved by the ethics committees of the Tenth  
10  
11 Affiliated Hospital of Tongji University and the First Affiliated Hospital  
12  
13 of Wenzhou Medical University.  
14

### 15 16 **Data collection**

17  
18 The general and anthropometric data of the patients were collected. The  
19  
20 general data contained the parameters of age, sex, diagnosis, morbidity,  
21  
22 the change of appetite and physical activity. The anthropometric  
23  
24 parameters included weight, height, unintentional weight loss, and body  
25  
26 mass index (BMI).  
27  
28  
29

### 30 31 **Reference standard: the new ESPEN diagnostic criteria for** 32 33 **malnutrition**

34  
35 According to the new ESPEN diagnostic criteria [16], malnutrition was  
36  
37 diagnosed when the patients met one of the following two options. Option  
38  
39 one required BMI < 18.5 kg/m<sup>2</sup>. Option two required unintentional  
40  
41 weight loss > 10% indefinite of time or > 5% over the last three months  
42  
43 combined with reduced BMI (< 20 kg/m<sup>2</sup> in patients younger than 70  
44  
45 years or < 22 kg/m<sup>2</sup> in patients older than 70 years).  
46  
47  
48  
49

### 50 51 **Assessment of nutritional risk**

52  
53 The assessment was performed by using the following nutritional  
54  
55 screening tools: NRS 2002, MUST, and MNA-SF.  
56  
57  
58  
59  
60

1  
2  
3  
4 NRS 2002 is proposed by the ESPEN guidelines based on an  
5  
6 analysis of controlled clinical trials [13]. It is designed to identify who  
7  
8 would benefit from nutritional supporting. This tool contains a severity of  
9  
10 disease score, a nutritional score and an age score. Severity of disease  
11  
12 score: one point for hip fracture, long-term hemodialysis, diabetes  
13  
14 mellitus, or chronic disease with acute complications; two points for  
15  
16 major abdominal surgery, hematological malignancies, stroke, or severe  
17  
18 pneumonia; three points for head injury, bone marrow transplantation, or  
19  
20 intensive care patients with APACHE more than 10. Nutritional score:  
21  
22 one point for weight loss > 5% in 3 months or food intake 50-75% of the  
23  
24 common condition; two points for weight loss > 5% in 2 months or BMI  
25  
26 18.5-20.5 kg/m<sup>2</sup> with impaired general condition or food intake 25-60%  
27  
28 of the general condition; three points for weight loss > 5% in 1 month or  
29  
30 BMI less than 18.5 kg/m<sup>2</sup> with impaired general condition or food intake  
31  
32 reduced by 25% compared with normal condition. Age score: one point  
33  
34 for age ≥ 70 years. Nutritional risk was assessed by summarizing the  
35  
36 severity disease score, nutritional score and the age score. Patients with  
37  
38 total score < 3 are at no or low risk, and with score ≥ 3 are at high risk.  
39  
40  
41  
42  
43  
44  
45  
46  
47

48  
49 MUST is developed to assess the nutritional risk for adults [14]. It  
50  
51 consists of parameters of BMI, unintentional weight loss and any acute  
52  
53 disease which compromises nutritional intake for more than 5 days. The  
54  
55 three parameters are rated as 0, 1, or 2 as follows: BMI > 20 kg/m<sup>2</sup> = 0;  
56  
57  
58  
59  
60

1  
2  
3 18.5-20 kg/m<sup>2</sup> = 1; < 18.5 kg/m<sup>2</sup> = 2; unintentional weight loss in the past  
4  
5  
6 3-6 months < 5% = 0; 5-10% = 1; > 10% = 2; acute disease: absent = 0;  
7  
8 present = 2. Overall risk of malnutrition is assessed by adding all the  
9  
10 points together. 0 is at low risk; score 1 is at medium risk; and score 2 is  
11  
12 at high risk.  
13  
14

15  
16 MNA-SF is the short form of MNA, and it is designed especially for  
17  
18 the elderly. It contains six questions selected from MNA.[15] These  
19  
20 questions are about BMI, recent weight loss, change of appetite, mobility,  
21  
22 psychological stress and neuropsychological problems. Each question is  
23  
24 rated from 0 to 2 or 3 and the total score of MNA-SF is 14. Patients with  
25  
26 12-14 points are at normal nutritional status. And patients with scores ≤  
27  
28 11 are at risk of malnutrition.  
29  
30  
31  
32

### 33 **Statistical analysis**

34  
35  
36 Statistical analysis was performed using SPSS software version 23.0 for  
37  
38 windows. Normally distributed continuous variables were expressed as  
39  
40 mean values and standard deviations (SD), categorical variables were  
41  
42 presented as absolute and relative frequencies. Independent t test and the  
43  
44 Pearson  $\chi^2$  test (or Fisher's exact test) were applied to the appropriate  
45  
46 comparison of variables. All reported P-values were compared to a  
47  
48 significance level of 5% based on two-sided tests. To determine  
49  
50 diagnostic concordance between the three assessment tools and the new  
51  
52 ESPEN diagnostic criteria for malnutrition, Cohen's kappa ( $\kappa$ ) statistic  
53  
54  
55  
56  
57  
58  
59  
60

was calculated. K coefficient reflects the consistency for qualitative variables.  $K = 1$  means completely consistency between the variables. And if there is no consistency among the variables then  $K \leq 0$ . Positive likelihood ratios (LR+) and negative likelihood ratios (LR-) were calculated for all three tools.

Sensitivity and specificity values for the three nutritional screening tools with the new ESPEN diagnostic criteria for malnutrition were calculated. Receiver operating characteristic curves (ROC) of the three screening tools were also used to evaluate the ability to accurately distinguish the malnourished patients. Area under the ROC curve (AUC) equal to 0.5 indicates that a tool has no diagnostic value, AUC equal to 0.5-0.7 indicates a tool has a low diagnostic value, AUC equal to 0.7-0.9 indicates a tool has a moderate diagnostic value, and AUC equal to 0.9-1 means a tool has a high diagnostic value.

## Results

Two hundred and fifty five patients were enrolled in this study (103 patients underwent gastric cancer surgery and 152 patients underwent colorectal cancer surgery). The characteristics of the sample were presented in Table 1.

**Table 1. Characteristics of the total patients.**

| Patient Characteristics  | Total (n=255) | GC (n=103) | CRC (n=152) | P value |
|--------------------------|---------------|------------|-------------|---------|
| Age <sup>a</sup> (years) | 76.5±4.8      | 76.1±4.6   | 76.8±4.9    | 0.318   |
| Sex <sup>b</sup>         |               |            |             |         |
| Male                     | 160(62.7%)    | 78(75.7%)  | 82(52.1%)   | <0.001* |
| Female                   | 95(37.3%)     | 25(24.3%)  | 70(47.9%)   |         |

|                                                                       |             |             |             |       |
|-----------------------------------------------------------------------|-------------|-------------|-------------|-------|
| Height <sup>a</sup> (m)                                               | 1.61±0.08   | 1.61±0.07   | 1.60±0.09   | 0.269 |
| Weight <sup>a</sup> (kg)                                              | 59.20±10.73 | 59.67±10.26 | 58.90±11.07 | 0.597 |
| BMI <sup>a</sup> (kg/m <sup>2</sup> )                                 | 22.93±3.55  | 22.93±3.50  | 22.96±3.59  | 0.994 |
| BMI <sup>b</sup> (<18.5kg/m <sup>2</sup> )                            | 26(10.2%)   | 11(10.7%)   | 15(9.9%)    | 0.834 |
| Weight loss <sup>b</sup> (>5% in 3 months or >10% indefinite of time) | 74(29.0%)   | 31(30.1%)   | 43(28.3%)   | 0.755 |

BMI: body mass index. GC: gastric cancer. CRC: colorectal cancer. \*Statistically significance ( $p \leq 0.05$ ).

<sup>a</sup> Values expressed as mean  $\pm$  standard deviation(SD) .

<sup>b</sup> Values expressed as frequencies and percentages.

P values were determined with the use of independent t test and the Pearson $\chi^2$  test.

Table 2 listed the characteristics and anthropometric data of the patients summarized and stratified according to the nutritional status. There were no difference in age or sex between the two groups classified by the three screening tools and the new ESPEN criteria for malnutrition. However, the BMI and weight loss (> 5% in 3 months or > 10% indefinite of time) differed between the groups.

**Table 2. Characteristics and anthropometric data stratified by the nutrition status of total patients.**

|                                                                       | ESPEN criteria              |                        |         | NRS 2002                  |                      |         | MUST                |                              |         | MNA-SF             |                                 |         |
|-----------------------------------------------------------------------|-----------------------------|------------------------|---------|---------------------------|----------------------|---------|---------------------|------------------------------|---------|--------------------|---------------------------------|---------|
|                                                                       | Not malnourished<br>(n=204) | Malnourished<br>(n=51) | P value | No or Low risk<br>(n=122) | High risk<br>(n=133) | P value | Low risk<br>(n=159) | Moderate/High risk<br>(n=96) | P value | No risk<br>(n=133) | Risk of malnutrition<br>(n=122) | P value |
| Age <sup>a</sup> (years)                                              | 76.3±4.8                    | 77.4±4.9               | 0.148   | 75.9±4.5                  | 77.0±5.0             | 0.059   | 76.1±4.6            | 77.1±5.1                     | 0.097   | 76.0±4.6           | 77.0±5.0                        | 0.102   |
| Sex <sup>b</sup>                                                      |                             |                        |         |                           |                      |         |                     |                              |         |                    |                                 |         |
| male                                                                  | 124(60.8%)                  | 36(70.6%)              | 0.195   | 73(59.8%)                 | 87(65.4%)            | 0.357   | 101(63.5%)          | 59(61.5%)                    | 0.741   | 90(67.7%)          | 70(57.4%)                       | 0.089   |
| female                                                                | 80(39.2%)                   | 15(29.4%)              |         | 49(40.2%)                 | 46(34.6%)            |         | 58(36.5%)           | 37(38.5%)                    |         | 43(32.3%)          | 52(42.6%)                       |         |
| Height <sup>a</sup> (m)                                               | 1.60±0.08                   | 1.63±0.08              | 0.046*  | 1.60±0.08                 | 1.61±0.09            | 0.155   | 1.60±0.08           | 1.61±0.09                    | 0.511   | 1.61±0.08          | 1.60±0.08                       | 0.112   |
| Weight <sup>a</sup> (kg)                                              | 61.55±10.00                 | 49.80±8.17             | <0.001* | 60.23±10.04               | 58.26±11.29          | 0.142   | 62.46±9.55          | 53.80±10.45                  | <0.001* | 63.32±9.56         | 54.72±10.16                     | <0.001* |
| BMI <sup>a</sup> (kg/m <sup>2</sup> )                                 | 23.98±3.01                  | 18.76±2.20             | <0.001* | 23.56±3.27                | 22.36±3.70           | 0.006*  | 24.28±2.95          | 20.71±3.34                   | <0.001* | 24.30±2.98         | 21.45±3.52                      | <0.001* |
| BMI <sup>b</sup> (<18.5kg/m <sup>2</sup> )                            | 1(0.5%)                     | 25(49.0%)              | <0.001* | 4(3.3%)                   | 22(16.5%)            | 0.001*  | 1(0.6%)             | 25(26.0%)                    | <0.001* | 1(0.8%)            | 25(20.5%)                       | <0.001* |
| Weight loss <sup>b</sup> (>5% in 3 months or >10% indefinite of time) | 34(16.7%)                   | 40(78.4%)              | <0.001* | 4(3.3%)                   | 70(52.6%)            | <0.001* | 14(8.8%)            | 60(62.5%)                    | <0.001* | 4(3.0%)            | 70(57.4%)                       | <0.001* |

\*Statistically significance ( $p \leq 0.05$ ).

<sup>a</sup> Values expressed as mean ± standard deviation(SD) .

<sup>b</sup> Values expressed as frequencies and percentages.

P values were determined with the use of independent t test and the Pearson  $\chi^2$  test(or Fisher's exact test where appropriate). BMI: body mass index.

The classification of malnutrition according to the new ESPEN criteria and the classification of nutritional risk according to the three screening tools were shown in Table 3. Among the patients, the prevalence of malnutrition was 20.0% when determined by the ESPEN criteria. The rate of high risk of malnutrition was 52.2% when determined by NRS 2002,

1  
2  
3  
4  
5  
6  
7  
8  
9  
10  
11  
12  
13  
14  
15  
16  
17  
18  
19  
20  
21  
22  
23  
24  
25  
26  
27  
28  
29  
30  
31  
32  
33  
34  
35  
36  
37  
38  
39  
40  
41  
42  
43  
44  
45  
46  
47  
48  
49

37.6% when determined by MUST, and 47.8% when determined by MNA-SF. Among patients who underwent curative gastrectomy, the prevalence of malnutrition was 22.3% when determined by the new ESPEN criteria. The rates of moderate or high risk of malnutrition were 52.4%, 45.6%, and 43.7% with NRS 2002, MUST, and MNA-SF respectively. Among colorectal surgery patients, the prevalence of malnutrition was 18.4% when determined by the new ESPEN criteria, the rates of moderate and high risk of malnutrition were 52.0%, 32.2%, and 50.7% with NRS 2002, MUST and MNA-SF, respectively.

**Table 3. Classification of the risk of malnutrition with the ESPEN criteria and the three screening tools.**

| Risk of malnutrition | Total                       |           |           |           | GC (n=103)                  |          |          |          | CRC (n=152)                 |          |           |          |
|----------------------|-----------------------------|-----------|-----------|-----------|-----------------------------|----------|----------|----------|-----------------------------|----------|-----------|----------|
|                      | ESPEN criteria <sup>a</sup> | NRS 2002  | MUST      | MNA-SF    | ESPEN criteria <sup>a</sup> | NRS 2002 | MUST     | MNA-SF   | ESPEN criteria <sup>a</sup> | NRS 2002 | MUST      | MNA-SF   |
| No/Low               | 80.0%                       | 47.8%     | 62.4%     | 52.2%     | 77.7%                       | 47.6%    | 54.4%    | 56.3%    | 81.6%                       | 48.0%    | 67.8%     | 49.3%    |
|                      | (204/255)                   | (122/255) | (159/255) | (133/255) | (80/103)                    | (49/103) | (56/103) | (58/103) | (124/152)                   | (73/152) | (103/152) | (75/152) |
| Moderate/High        | 20.0%                       | 52.2%     | 37.6%     | 47.8%     | 22.3%                       | 52.4%    | 45.6%    | 43.7%    | 18.4%                       | 52.0%    | 32.2%     | 50.7%    |
|                      | (51/255)                    | (133/255) | (96/255)  | (122/255) | (23/103)                    | (54/103) | (47/103) | (45/103) | (28/152)                    | (79/152) | (49/152)  | (77/152) |

GC: gastric cancer. CRC: colorectal cancer.

<sup>a</sup> Classification of malnutrition according to the ESPEN consensus definition of malnutrition.

Cross tabulation of the results of the three tools and the classification of malnutrition according to the ESPEN

consensus definition of malnutrition can be found in Table 4.

**Table 4. Cross tabulation of the results of the three screening tools and the classification of malnutrition according to the ESPEN consensus definition of malnutrition.**

|                |                  | NRS 2002    |                    | MUST     |                    | MNA-SF  |      |
|----------------|------------------|-------------|--------------------|----------|--------------------|---------|------|
|                |                  | No/Low risk | Moderate/High risk | Low risk | Moderate/High risk | No risk | Risk |
| ESPEN criteria | Not Malnourished | 118         | 86                 | 156      | 48                 | 130     | 74   |
|                | Malnourished     | 4           | 47                 | 3        | 48                 | 3       | 48   |

The consistency between the nutritional screening tools and the new ESPEN diagnostic criteria for malnutrition was different. Among the total patients, MUST and MNA had the same sensitivity (94.1%), and NRS 2002 had the lowest sensitivity (92.2%). Moreover, MUST had the highest specificity (76.5%) compared with NRS 2002 (57.8%) and MNA-SF (63.7%). MUST had the highest positive predictive value (50.0%) and the highest negative predictive value (98.1%).

In the total patients, MUST had the highest K value ( $K = 0.530$ ,  $p < 0.001$ ) compared with MNA-SF ( $K = 0.380$ ,  $p < 0.001$ ) and NRS 2002 ( $K = 0.312$ ,  $p < 0.001$ ). In the gastric group, MUST had the highest K value. In the colorectal group, MUST had a higher level of consistency ( $K = 0.576$ ,  $p < 0.001$ ) compared with the fair consistencies in NRS 2002 ( $K = 0.243$ ,  $p < 0.001$ ) and MNA-SF ( $K = 0.361$ ,  $p < 0.001$ ). Finally, the area under the curve (AUC) calculated by the ROC



indicated that all three screening tools had a moderate level of diagnostic value to distinguish a malnourished patient (AUC of NRS 2002, MUST and MNA-SF were found to be 0.750, 0.853 and 0.789, respectively). Results are presented in details in Table 5.

**Table 5. Statistical evaluation of the malnutrition screening tools compared with the diagnostic criteria of the ESPEN consensus.**

|                                 | Total         |               |               | GC            |               |               | CRC           |               |               |
|---------------------------------|---------------|---------------|---------------|---------------|---------------|---------------|---------------|---------------|---------------|
|                                 | NRS 2002      | MUST          | MNA-SF        | NRS 2002      | MUST          | MNA-SF        | NRS 2002      | MUST          | MNA-SF        |
| Sensitivity (%)                 | 92.2          | 94.1          | 94.1          | 100.0         | 95.7          | 87.0          | 85.7          | 92.9          | 100.0         |
| Specificity (%)                 | 57.8          | 76.5          | 63.7          | 61.3          | 68.8          | 68.8          | 55.6          | 81.5          | 60.5          |
| Positive predictive value (%)   | 35.3          | 50.0          | 39.3          | 42.6          | 46.8          | 44.4          | 30.4          | 53.1          | 36.4          |
| Negative predictive value (%)   | 96.7          | 98.1          | 97.7          | 100.0         | 98.2          | 94.8          | 94.5          | 98.1          | 100.0         |
| Positive likelihood ratio (LR+) | 2.18          | 4.00          | 2.59          | 2.61          | 3.06          | 2.78          | 1.93          | 5.02          | 2.53          |
| Negative likelihood ratio (LR-) | 0.13          | 0.08          | 0.09          | 0.00          | 0.06          | 0.19          | 0.26          | 0.09          | 0.00          |
| K value (p)                     | 0.312(<0.001) | 0.530(<0.001) | 0.380(<0.001) | 0.414(<0.001) | 0.469(<0.001) | 0.415(<0.001) | 0.243(<0.001) | 0.576(<0.001) | 0.361(<0.001) |
| AUC                             | 0.750         | 0.853         | 0.789         | 0.806         | 0.822         | 0.779         | 0.707         | 0.872         | 0.802         |

GC: gastric cancer. CRC: colorectal cancer.

K value derived from Cohen kappa statistics.

AUC: Area under the curve from ROC.

## Discussion

This study is the first to apply the new ESPEN diagnostic criteria to the specific population of elderly gastrointestinal cancer patients, and 20.0% of the patients were classified as malnourished according to the new ESPEN diagnostic criteria for malnutrition. Another previous study has investigated the prevalence of malnutrition diagnosed by the new ESPEN criteria in four diverse populations.[19] In that study, 0.5% of the healthy elderly individuals and 6% of the geriatric outpatients were identified as malnourished. It is significantly lower compared with that of our study, which indicated that patients with gastrointestinal cancer might have a higher prevalence of malnutrition. The difference in the malnutrition rates also indicated that we should put emphasis on the requirement to assess the nutritional risk of the hospitalized elderly gastrointestinal cancer patients.

In the present study, 52.2% and 37.6% of the patients were found to be at moderate or high risk of malnutrition according to NRS 2002 and MUST respectively. With the MNA-SF, 47.8% of the patients were found to be at a risk of malnutrition. The various prevalence of the risk of malnutrition can result from the differences between the nutritional screening tools. In our study, MUST had the greatest K value compared with the NRS 2002 and MNA-SF. It showed that a greater proportion of the elderly patients with gastrointestinal cancer who were distinguished to

1  
2  
3  
4 be at moderate or high risk of malnutrition with MUST could be  
5  
6 identified as malnourished according to the ESPEN diagnostic criteria. In  
7  
8 other words, MUST can perform the best to detect the specific  
9  
10 malnourished individuals diagnosed by the new ESPEN criteria,  
11  
12 compared with NRS 2002 and MNA-SF. Furthermore, MUST has the  
13  
14 greatest AUC compared with NRS 2002 and MNA-SF in our study.  
15  
16  
17

18  
19 Many previous studies compared the three nutritional screening tools  
20  
21 in specific populations. Poulia et al. evaluated the efficacy of six  
22  
23 nutritional screening tools in the elderly.[20] In Poulia's study, NRS 2002  
24  
25 was found to overestimate nutritional risk, MNA-SF was proven to have a  
26  
27 great validity, and MUST was found to have the best validity and the  
28  
29 greatest consistency. Another study by Myoungha et al.[21] evaluated five  
30  
31 nutritional screening tools, and suggested that MNA-SF overestimated  
32  
33 the nutritional risk in the elderly, and NRS 2002 performed better than  
34  
35 MNA-SF. However, MUST was also found to be the most efficient and  
36  
37 useful screening tool in this study. Both the previous studies compared  
38  
39 the screening tools with a combined index suggested by Pablo et al.,[22]  
40  
41 and they confirmed our results for the best performance of MUST  
42  
43 compared with NRS 2002 and MNA-SF. While Donini et al. developed a  
44  
45 study for the nutritional evaluation of the elderly nursing home  
46  
47 residents[23] and found that MNA-SF presented a higher predictive value  
48  
49 compared with NRS 2002 and MUST. However, in the study by Donini et  
50  
51  
52  
53  
54  
55  
56  
57  
58  
59  
60

1  
2  
3  
4 al., MNA was taken as the reference standard, which might induce an  
5  
6 underpowered result. A previous study used the new ESPEN diagnostic  
7  
8 criteria for malnutrition as a reference standard to compare nutritional  
9  
10 screening tools.[24] However, MNA-SF was not included in this study,  
11  
12 and the participators were not merely the elderly.  
13  
14

15  
16 The results of the comparison among NRS 2002, MUST and  
17  
18 MNA-SF showed different efficiency of the three screening tools in our  
19  
20 study. There might be an explanation for the differences. The original  
21  
22 designs of the three nutritional screening tools were different. NRS 2002  
23  
24 was developed to determine who would benefit from nutritional  
25  
26 supporting and it might distinguish an increased number of patients to be  
27  
28 at high risk of malnutrition. However, MUST was a screening tool to  
29  
30 identify adults who are at risk of malnutrition. MNA-SF, the short form of  
31  
32 MNA, was developed as a quick and easy nutritional screening tool and  
33  
34 was used for primary screening before further assessment. The different  
35  
36 results between our study and others can be attributed to the different  
37  
38 populations and reference standards, just as what Ma et al. had mentioned  
39  
40 in their review.[25]  
41  
42  
43  
44  
45  
46  
47

48  
49 Moreover, in our study, we evaluated the adequacy of the nutritional  
50  
51 screening tools in the gastric cancer patients and the colorectal cancer  
52  
53 patients, respectively. In the gastric cancer population, NRS 2002, MUST  
54  
55 and MNA-SF all had a same moderate level of consistency with the new  
56  
57  
58  
59  
60

1  
2  
3  
4 ESPEN diagnostic criteria for malnutrition ( $K = 0.414$  for NRS 2002,  
5  
6 0.469 for MUST and 0.415 for MNA-SF, respectively). While in the  
7  
8 colorectal population, MUST had the highest level of consistency ( $K =$   
9  
10 0.576) compared with the fair level of consistency of NRS 2002 ( $K =$   
11  
12 0.243) and MNA-SF ( $K = 0.361$ ). Based on the result, we concluded that  
13  
14 MUST could perform the best in the specific colorectal cancer patients.  
15  
16 Further studies are needed to confirm our conclusion.  
17  
18  
19

20  
21 It is of great significance to improve the nutritional status of the  
22  
23 elderly patients with gastrointestinal cancer if they are malnourished or at  
24  
25 risk of malnutrition. As the first step to identify who are malnourished or  
26  
27 at risk of malnutrition, nutritional screening should be reliable and easy to  
28  
29 perform. To the best of our knowledge, this is the first study to compare  
30  
31 the three nutritional screening tools in the specific geriatric  
32  
33 gastrointestinal cancer population. Our study suggested that MUST is the  
34  
35 best choice in the three common nutritional screening tools. For the  
36  
37 accuracy and simplicity of MUST, both the patients and surgeons will  
38  
39 benefit from it. Furthermore, in our study, though there were some  
40  
41 differences in sensitivity and specificity, the three tools were found to  
42  
43 have a same level of consistency in the gastric cancer population, while in  
44  
45 the colorectal cancer population, MUST had the highest level of  
46  
47 consistency compared with the others. It indicated that we can choose one  
48  
49 of three nutritional screening tools when assessing nutritional risk among  
50  
51  
52  
53  
54  
55  
56  
57  
58  
59  
60

1  
2  
3  
4 the elderly patients with gastric cancer. However, when assessing  
5  
6 nutritional risk among the elderly patients with colorectal cancer, MUST  
7  
8 is the only choice for the highest accuracy.  
9

10  
11 The present study has some limitations. Firstly, the sample size is  
12  
13 relatively small. However, this study was conducted in two centers with  
14  
15 large surgical volume. So we believe that the data in our study are more  
16  
17 representative. To a certain extent, it overcame the smallness of the  
18  
19 sample size. Secondly, according to the new ESPEN diagnostic criteria  
20  
21 for malnutrition, malnutrition can also be diagnosed by unintentional  
22  
23 weight loss combined with reduced fat free mass index (FFMI). So  
24  
25 another limitation of our study is the lack of data for fat free mass index.  
26  
27 However, the measurement of FFMI requires specific equipment and  
28  
29 extra costs. Moreover, Trummer et al. found that low BMI and low FFMI  
30  
31 were closely correlative.[25] In that study, FFMI less than 17 kg/m<sup>2</sup> for  
32  
33 men and less than 15 kg/m<sup>2</sup> for women were roughly equivalent to BMI  
34  
35 less than 18.5 kg/m<sup>2</sup> after determining the FFM levels.  
36  
37  
38  
39  
40  
41  
42

## 43 44 **Conclusions**

45  
46 To our knowledge, this is the first study to compare the three  
47  
48 malnutrition screening tools (NRS 2002, MUST and MNA-SF) with the  
49  
50 new ESPEN diagnostic criteria for malnutrition, and it is also the first  
51  
52 study to evaluate the three screening tools in the specific geriatric  
53  
54 gastrointestinal cancer patients. The prevalence of malnutrition was 20.0%  
55  
56  
57  
58  
59  
60

1  
2  
3  
4 with the ESPEN diagnostic criteria for malnutrition for patients with  
5  
6 gastrointestinal cancer in the present study. MUST was found to perform  
7  
8 the best to identify the malnourished elderly gastrointestinal cancer  
9  
10 patients distinguished by the new ESPEN diagnostic criteria for  
11  
12 malnutrition. Nevertheless, further studies are needed to verify our  
13  
14 findings.  
15  
16  
17  
18  
19  
20

## 21 **References**

- 22  
23 1. Hurria A, Gupta S, Zauderer M, et al. Developing a cancer-specific  
24  
25 geriatric assessment: a feasibility study. *Cancer* 2005;104:1998-2005.  
26  
27 doi:10.1002/cncr.21422.  
28  
29
- 30  
31 2. Balducci L, Extermann M. Cancer and aging. An evolving panorama.  
32  
33 *Hematology/oncology Clinics of North America* 2000;14:1-16.  
34  
35
- 36  
37 3. Marugame T, Dongmei Q. Comparison of Time Trends in Stomach  
38  
39 Cancer Incidence (1973–1997) in East Asia, Europe and USA, from  
40  
41 *Cancer Incidence in Five Continents Vol. IV–VIII. Jpn J Clin Oncol.*  
42  
43 2007;37:242-3. doi:10.1093/jjco/hym014.  
44  
45
- 46  
47 4. Biondi A, Vacante M, Ambrosino I, et al. Role of surgery for  
48  
49 colorectal cancer in the elderly. *World Journal of Gastrointestinal*  
50  
51 *Surgery* 2011;8:606-13. doi:10.4240/wjgs.v8.i9.606  
52  
53
- 54  
55 5. Takeshita H, Ichikawa D, Komatsu S, et al. Surgical outcomes of  
56  
57 gastrectomy for elderly patients with gastric cancer. *World Journal of*  
58  
59  
60

- 1  
2  
3  
4 Surgery 2013;37:2891-8. doi: 10.1007/s00268-013-2210-7.  
5  
6  
7 6. Simmonds PD, Best L, George S, et al. Surgery for colorectal cancer  
8  
9 in elderly patients: a systematic review. *Lancet* 2000;356:968-74.  
10  
11 doi:[http://dx.doi.org/10.1016/S0140-6736\(00\)02713-6](http://dx.doi.org/10.1016/S0140-6736(00)02713-6).  
12  
13  
14 7. Heriot AG, Tekkis PP, Smith JJ, et al. Prediction of postoperative  
15  
16 mortality in elderly patients with colorectal cancer. *Diseases of the*  
17  
18 *Colon & Rectum* 2006;49:816-24. doi: 10.1007/s10350-006-0523-4.  
19  
20  
21 8. Audisio RA, Balch CM. Why Can't Surgeons Treat Older Patients the  
22  
23 Same as Younger Patients? *Annals of Surgical Oncology*  
24  
25 2016;23:4123-5. doi:10.1245/s10434-016-5459-x.  
26  
27  
28 9. Brownie S. Why are elderly individuals at risk of nutritional  
29  
30 deficiency? *International Journal of Nursing Practice* 2006, 12:110-8.  
31  
32 doi:10.1111/j.1440-172X.2006.00557.x.  
33  
34  
35 10. Bozzetti F. Why the oncologist should consider the nutritional status  
36  
37 of the elderly cancer patient. *Nutrition* 2015;31:590-3.  
38  
39 doi:10.1016/j.nut.2014.12.005.  
40  
41  
42 11. Martucci RB, Barbosa MV, D'Almeida CA, et al. Undernutrition as  
43  
44 independent predictor of early mortality in elderly cancer patients.  
45  
46 *Nutrition* 2017;34:65-70. doi:10.1016/j.nut.2016.09.011.  
47  
48  
49 12. Kondrup J, Allison SP, Elia M, et al. ESPEN guidelines for nutrition  
50  
51 screening 2002. *Clinical Nutrition* 2003;22:415-21.  
52  
53  
54  
55  
56  
57  
58  
59  
60



- 1  
2  
3  
4 13. Hamberg O. Nutritional risk screening (NRS 2002): a new method  
5  
6 based on an analysis of controlled clinical trials. *Clinical Nutrition*  
7  
8 2003;22:321-36. doi:10.1016/S0261-5614(02)00214-5.  
9
- 10  
11 14. Elia M. The 'MUST' report. Nutritional screening for adults: a  
12  
13 multidisciplinary responsibility. Development and use of the  
14  
15 'Malnutrition Universal Screening Tool' (MUST) for adults. British  
16  
17 Association for Parenteral and Enteral Nutrition (BAPEN) 2003.  
18  
19
- 20  
21 15. Rubenstein LZ, Harker JO, Salvà A, et al. Screening for  
22  
23 undernutrition in geriatric practice: developing the short-form  
24  
25 mini-nutritional assessment (MNA-SF). *Journals of Gerontology*  
26  
27 2001;56:M366-72.  
28  
29
- 30  
31 16. Cederholm T, Bosaeus I, Barazzoni R, et al. Diagnostic criteria for  
32  
33 malnutrition - An ESPEN Consensus Statement. *Clinical Nutrition*  
34  
35 2015;139:335-40. doi:10.1016/j.clnu.2015.03.001.  
36  
37
- 38  
39 17. Guerra RS, Fonseca I, Sousa AS, et al. ESPEN diagnostic criteria for  
40  
41 malnutrition – A validation study in hospitalized patients. *Clinical*  
42  
43 *Nutrition* 2016 [Epub ahead of print] doi:10.1016/j.clnu.2016.08.022.  
44  
45
- 46  
47 18. Rondel AL, Langius JA, de van der Schueren MA, et al. The new  
48  
49 ESPEN diagnostic criteria for malnutrition predict overall survival in  
50  
51 hospitalised patients. *Clinical Nutrition* 2016 [Epub ahead of print]  
52  
53 doi:10.1016/j.clnu.2016.11.018.  
54  
55
- 56  
57 19. Rojer AG, Kruijenga HM, Trappenburg MC, et al. The prevalence of  
58  
59  
60

- malnutrition according to the new ESPEN definition in four diverse populations. *Clinical Nutrition* 2015;35:758-62. doi:10.1016/j.clnu.2015.06.005.
20. Poulia KA, Yannakoulia M, Karageorgou D, et al. Evaluation of the efficacy of six nutritional screening tools to predict malnutrition in the elderly. *Clinical Nutrition* 2012;31:378-85. doi:10.1016/j.clnu.2011.11.017.
21. Myoungha B, Youngran H. Evaluation of the efficacy of nutritional screening tools to predict malnutrition in the elderly at a geriatric care hospital. *Nutrition Research & Practice* 2015;9:637-43. doi:10.4162/nrp.2015.9.6.637.
22. Pablo AM, Izaga MA, Alday LA. Assessment of nutritional status on hospital admission: nutritional scores. *European Journal of Clinical Nutrition* 2003;57:824-31. doi:10.1038/sj.ejcn.1601616.
23. Donini LM, Poggiogalle E, Molfino A, et al. Mini-Nutritional Assessment, Malnutrition Universal Screening Tool, and Nutrition Risk Screening Tool for the Nutritional Evaluation of Older Nursing Home Residents. *J Am Med Dir Assoc* 2016;17:959.e11-8. doi:10.1016/j.jamda.2016.06.028.
24. Poulia KA, Klek S, Doundoulakis I, et al. The two most popular malnutrition screening tools in the light of the new ESPEN consensus definition of the diagnostic criteria for malnutrition. *Clinical Nutrition*

1  
2  
3  
4  
5  
6  
7  
8  
9  
10  
11  
12  
13  
14  
15  
16  
17  
18  
19  
20  
21  
22  
23  
24  
25  
26  
27  
28  
29  
30  
31  
32  
33  
34  
35  
36  
37  
38  
39  
40  
41  
42  
43  
44  
45  
46  
47  
48  
49  
50  
51  
52  
53  
54  
55  
56  
57  
58  
59  
60

2017;36:1130-5. doi:10.1016/j.clnu.2016.07.014.

25. van Bokhorst-de van der Schueren MA, Guaitoli PR, Jansma EP, et al. Nutrition screening tools: does one size fit all? A systematic review of screening tools for the hospital setting. *Clinical Nutrition* 2014;33:39-58. doi:10.1016/j.clnu.2013.04.008.
26. Bahadori B, Uitz E, Tonninger-Bahadori K, et al. Body composition: the fat-free mass index (FFMI) and the body fat mass index (BFMI) distribution among the adult Austrian population-results of a cross-sectional pilot study. *International Journal of Body Composition Research* 2006;4:123-8.

**Contributors:** Xiao-Jun Ye and Yan-Bin Ji are joint first authors. Zhen Yu, Cheng-Le Zhuang, and Xian Shen designed the study. Bing-Wei Ma and Wei-Zhe Chen collected the data. Dong-Dong Huang and Zong-You Pan analyzed the data. Xiao-Jun Ye and Yan-Bin Ji drafted the manuscript. Zhen Yu and Cheng-Le Zhuang approved the final version of the manuscript. All authors have read and approved the final manuscript.

**Data sharing statement:** No additional unpublished data are available.

# BMJ Open

## Comparison of three common nutritional screening tools with the new European Society for Clinical Nutrition and Metabolism (ESPEN) criteria for malnutrition among geriatric gastrointestinal cancer patients: a prospective study in China

|                                 |                                                                                                                                                                                                                                                                                                                                                                                                                                                                                                                                                                                                                                                                                                                                                                                                                                                                                                                                                                                                                                                                                                                                                                                                                                                            |
|---------------------------------|------------------------------------------------------------------------------------------------------------------------------------------------------------------------------------------------------------------------------------------------------------------------------------------------------------------------------------------------------------------------------------------------------------------------------------------------------------------------------------------------------------------------------------------------------------------------------------------------------------------------------------------------------------------------------------------------------------------------------------------------------------------------------------------------------------------------------------------------------------------------------------------------------------------------------------------------------------------------------------------------------------------------------------------------------------------------------------------------------------------------------------------------------------------------------------------------------------------------------------------------------------|
| Journal:                        | <i>BMJ Open</i>                                                                                                                                                                                                                                                                                                                                                                                                                                                                                                                                                                                                                                                                                                                                                                                                                                                                                                                                                                                                                                                                                                                                                                                                                                            |
| Manuscript ID                   | bmjopen-2017-019750.R1                                                                                                                                                                                                                                                                                                                                                                                                                                                                                                                                                                                                                                                                                                                                                                                                                                                                                                                                                                                                                                                                                                                                                                                                                                     |
| Article Type:                   | Research                                                                                                                                                                                                                                                                                                                                                                                                                                                                                                                                                                                                                                                                                                                                                                                                                                                                                                                                                                                                                                                                                                                                                                                                                                                   |
| Date Submitted by the Author:   | 05-Feb-2018                                                                                                                                                                                                                                                                                                                                                                                                                                                                                                                                                                                                                                                                                                                                                                                                                                                                                                                                                                                                                                                                                                                                                                                                                                                |
| Complete List of Authors:       | Ye, Xiao-Jun; Shanghai Tenth People's Hospital Affiliated to Tongji University, Department of Gastrointestinal Surgery; Medical College of Soochow University, Department of Medicine<br>Ji, Yan-Bin; Shanghai Tenth People's Hospital Affiliated to Tongji University, Department of Gastrointestinal Surgery; Shanghai Clinical Institution, Anhui Medical University, Department of Gastrointestinal Surgery<br>Ma, Bing-Wei; Shanghai Tenth People's Hospital Affiliated to Tongji University, Department of Gastrointestinal Surgery<br>Huang, Dong-Dong; Shanghai Tenth People's Hospital Affiliated to Tongji University, Department of Gastrointestinal Surgery<br>Chen, Wei-Zhe; The First Affiliated Hospital, Wenzhou Medical University, Department of Gastrointestinal Surgery<br>Pan, Zong-You; School of Medicine, Zhejiang University, Department of Sports Medicine<br>Shen, Xian; The Second Affiliated Hospital, Wenzhou Medical University, Department of Gastrointestinal Surgery<br>Zhuang, Cheng-Le; Shanghai Tenth People's Hospital Affiliated to Tongji University, Department of Gastrointestinal Surgery<br>Yu, Zhen; Shanghai Tenth People's Hospital Affiliated to Tongji University, Department of Gastrointestinal Surgery |
| <b>Primary Subject Heading</b>: | Nutrition and metabolism                                                                                                                                                                                                                                                                                                                                                                                                                                                                                                                                                                                                                                                                                                                                                                                                                                                                                                                                                                                                                                                                                                                                                                                                                                   |
| Secondary Subject Heading:      | Gastroenterology and hepatology                                                                                                                                                                                                                                                                                                                                                                                                                                                                                                                                                                                                                                                                                                                                                                                                                                                                                                                                                                                                                                                                                                                                                                                                                            |
| Keywords:                       | Malnutrition, nutritional screening tools, ESPEN diagnostic criteria, elderly, gastrointestinal cancer                                                                                                                                                                                                                                                                                                                                                                                                                                                                                                                                                                                                                                                                                                                                                                                                                                                                                                                                                                                                                                                                                                                                                     |
|                                 |                                                                                                                                                                                                                                                                                                                                                                                                                                                                                                                                                                                                                                                                                                                                                                                                                                                                                                                                                                                                                                                                                                                                                                                                                                                            |

SCHOLARONE™  
Manuscripts

1  
2  
3  
4 **Comparison of three common nutritional screening tools with the**  
5  
6 **new European Society for Clinical Nutrition and Metabolism**  
7  
8 **(ESPEN) criteria for malnutrition among geriatric gastrointestinal**  
9  
10 **cancer patients: a prospective study in China**  
11

12  
13 Xiao-Jun Ye, MD<sup>1,5¶</sup>, Yan-Bin Ji, MD<sup>1,6¶</sup>, Bing-Wei Ma, MD<sup>1</sup>,  
14  
15 Dong-Dong Huang, MD<sup>1</sup>, Wei-Zhe Chen, MD<sup>2</sup>, Zong-You Pan, MD<sup>3</sup>,  
16  
17 Xian Shen, MD, PhD<sup>4</sup>, Cheng-Le Zhuang, MD, PhD<sup>1</sup>, and Zhen Yu, MD,  
18  
19 PhD<sup>1,2</sup>  
20  
21  
22  
23  
24

25 <sup>1</sup> Department of Gastrointestinal Surgery, Shanghai Tenth People's  
26  
27 Hospital Affiliated to Tongji University, Shanghai, China;

28  
29 <sup>2</sup> Department of Gastrointestinal Surgery, The First Affiliated Hospital,  
30  
31 Wenzhou Medical University, Wenzhou, Zhejiang, China;

32  
33 <sup>3</sup> Department of Sports Medicine, School of Medicine, Zhejiang  
34  
35 University, Hangzhou, Zhejiang, China;

36  
37 <sup>4</sup> Department of Gastrointestinal Surgery, The Second Affiliated Hospital,  
38  
39 Wenzhou Medical University, Wenzhou, Zhejiang, China;

40  
41 <sup>5</sup> Medical College of Soochow University, Suzhou, Jiangsu, China;

42  
43 <sup>6</sup> Department of Gastrointestinal Surgery, Shanghai Clinical Institution,  
44  
45 Anhui Medical University, Shanghai, China.  
46  
47  
48  
49  
50  
51  
52  
53

54  
55 ¶These authors contributed equally to this work.  
56

1  
2  
3  
4  
5  
6 Correspondence to:

7  
8 Dr Zhen Yu; yuzhen0577@gmail.com and Dr Cheng-Le Zhuang;  
9  
10 zhuangchengle@126.com  
11  
12  
13  
14  
15

16 **Correspondence address:**

17  
18 Department of Gastrointestinal Surgery, Shanghai Tenth People's  
19  
20 Hospital affiliated to Tongji University, 301 Yanchang Road, Shanghai  
21  
22 200072, China  
23

24  
25 Tel.: +86 02166307132; fax: +86 02159410409.  
26  
27

28 **Funders:** This work was funded by the Science and Technology  
29  
30 Commission of Shanghai Municipality [grant number 16411954200]; and  
31  
32 Shanghai Municipal Commission of Health and Family Planning [grant  
33  
34 number 201640013].  
35  
36

37  
38 **Registration Number: ChiCTR-RRC-16009831**

39  
40 **All authors reported no biomedical financial interests or potential**  
41  
42 **conflicts of interest.**  
43  
44  
45  
46  
47  
48  
49  
50  
51  
52  
53  
54  
55  
56  
57  
58  
59  
60

## Abstract

Objective: The aim of this study was to evaluate and compare the three common nutritional screening tools with the new European Society for Clinical Nutrition and Metabolism (ESPEN) diagnostic criteria for malnutrition among the elderly gastrointestinal cancer patients.

Research Methods & Procedures: Nutritional screening tools, including Nutritional Risk Screening 2002 (NRS 2002), Malnutrition Universal Screening Tool (MUST) and the Short Form of Mini Nutrition Assessment (MNA-SF), were applied to 255 patients with gastrointestinal cancer. We compared the diagnostic value of these tools for malnutrition, using the new ESPEN diagnostic criteria for malnutrition as the “gold standards”.

Results: According to the new ESPEN diagnostic criteria for malnutrition, 20.0% of the patients were diagnosed as malnourished. With the use of NRS 2002, 52.2% of the patients were found to be at high risk of malnutrition, with the use of MUST, 37.6% of the patients were found to be at moderate/high risk of malnutrition, and according to MNA-SF, 47.8% of the patients were found to be at nutritional risk. MUST was the best correlated with the ESPEN diagnostic criteria ( $K = 0.530$ ,  $p < 0.001$ ) compared with NRS 2002 ( $K = 0.312$ ,  $p < 0.001$ ) and MNA-SF ( $K = 0.380$ ,  $p < 0.001$ ). The ROC curve of MUST had the highest Area Under the Curve (AUC) compared with NRS 2002 and MNA-SF.

1  
2  
3  
4  
5  
6  
7  
8  
9  
10  
11  
12  
13  
14  
15  
16  
17  
18  
19  
20  
21  
22  
23  
24  
25  
26  
27  
28  
29  
30  
31  
32  
33  
34  
35  
36  
37  
38  
39  
40  
41  
42  
43  
44  
45  
46  
47  
48  
49  
50  
51  
52  
53  
54  
55  
56  
57  
58  
59  
60

Conclusions: MUST was found to perform the best to identify the malnourished elderly gastrointestinal cancer patients distinguished by the new ESPEN diagnostic criteria for malnutrition. Nevertheless, further studies are needed to verify our findings.

Keywords: Malnutrition, nutritional screening tools, ESPEN diagnostic criteria, elderly, gastrointestinal cancer

### **Strengths and limitations of this study**

- To our best knowledge, this is the first study to evaluate the three screening tools in the specific geriatric gastrointestinal cancer patients.
- We compared the diagnostic value of the three screening tools, using the new ESPEN diagnostic criteria for malnutrition as the “gold standards”.
- the sample size is relatively small. However, this study was conducted in two centers with large surgical volume. To a certain extent, it overcame the smallness of the sample size.



## Introduction

As the life expectancy and world population ages increase, the proportion of elderly patients has been enlarged obviously. It is well known that the risk of cancer increases with age. More than half of the malignancies occur in people aged  $\geq 65$  years.[1, 2] Gastrointestinal cancer is one of the most common malignancies in the elderly,[3] and surgical excision remains the most effective therapy for gastrointestinal cancers.[4] Although the surgical techniques have been improved significantly, elderly gastrointestinal cancer patients still have a high frequency of complications and mortality.[4-8] This is partly due to the high prevalence of malnutrition, which is a common and serious problem in the elderly cancer patients.[9, 10, 11] Therefore, it is important to evaluate the nutritional risk of the geriatric gastrointestinal cancer patients before surgery.

To accurately assess the nutritional risk, it is important to choose an efficient nutritional screening tool. Although there are many widely used nutritional screening tools,[12] such as Nutritional Risk Screening 2002 (NRS 2002),[13] Malnutrition Universal Screening Tool (MUST)[14] and the Short Form of Mini Nutritional Assessment (MNA-SF),[15] it has not been established which is the most efficient and appropriate for nutritional screening in the elderly patients with gastrointestinal cancers.

Moreover, there is a lack of universal definition of malnutrition, which may lead to an inaccurate assessment and comparison of the nutritional screening tools.

Recently, a diagnostic criteria for malnutrition has been proposed by the European Society for Clinical Nutrition and Metabolism (ESPEN),<sup>[16]</sup> and it had been validated by some studies.<sup>[17, 18]</sup> As the new criteria of defining malnutrition being proposed, it provides a reference standard for the evaluation and comparison of the nutritional screening tools. Therefore, our study was developed to evaluate the consistency of the three common nutritional screening tools with the new ESPEN diagnostic criteria for malnutrition and make a comparison of them among geriatric gastrointestinal cancer patients.

## Materials and Methods

### Patients

Between January 2016 and May 2017, 255 patients who underwent curative surgery for gastrointestinal cancer in two hospitals from Shanghai and Wenzhou were included in this study. The inclusion criteria included: (1) those underwent elective curative surgery for gastrointestinal cancer; (2) those aged  $\geq 70$  years; (3) those signed the informed consent and agreed to participate in this study. The exclusion criteria included: (1) those performed a palliative or emergency operation;

1  
2  
3 (2) those aged < 70 years; (3) those cannot be assessed by NRS 2002,  
4 MUST and MNA-SF for the difficulty of data collection; (4) those  
5  
6 refused to take part in this study.  
7  
8  
9

10 This study was approved by the ethics committees of the Tenth  
11  
12 Affiliated Hospital of Tongji University and the First Affiliated Hospital  
13  
14 of Wenzhou Medical University.  
15  
16

### 17 **Data collection**

18  
19 The general and anthropometric data of the patients were collected. The  
20  
21 general data contained the parameters of age, sex, diagnosis, morbidity,  
22  
23 the change of appetite and physical activity. The anthropometric  
24  
25 parameters included weight, height, unintentional weight loss, and body  
26  
27 mass index (BMI).  
28  
29  
30  
31

### 32 **Reference standard: the new ESPEN diagnostic criteria for**

### 33 **malnutrition**

34  
35 According to the new ESPEN diagnostic criteria [16], malnutrition was  
36  
37 diagnosed when the patients met one of the following two options. Option  
38  
39 one required BMI < 18.5 kg/m<sup>2</sup>. Option two required unintentional  
40  
41 weight loss > 10% indefinite of time or > 5% over the last three months  
42  
43 combined with reduced BMI (< 20 kg/m<sup>2</sup> in patients younger than 70  
44  
45 years or < 22 kg/m<sup>2</sup> in patients older than 70 years).  
46  
47  
48  
49  
50  
51

### 52 **Assessment of nutritional risk**

53  
54 The assessment was performed by using the following nutritional  
55  
56

1  
2  
3  
4 screening tools: NRS 2002, MUST, and MNA-SF.  
5

6 NRS 2002 is proposed by the ESPEN guidelines based on an  
7  
8 analysis of controlled clinical trials [13]. It is designed to identify who  
9  
10 needs nutritional supporting. This tool contains a severity of disease score,  
11  
12 a nutritional score and an age score. Severity of disease score: one point  
13  
14 for hip fracture, long-term hemodialysis, diabetes mellitus, or chronic  
15  
16 disease with acute complications; two points for major abdominal surgery,  
17  
18 hematological malignancies, stroke, or severe pneumonia; three points for  
19  
20 head injury, bone marrow transplantation, or intensive care patients with  
21  
22 APACHE more than 10. Nutritional score: one point for weight loss > 5%  
23  
24 in 3 months or food intake 50-75% of the common condition; two points  
25  
26 for weight loss > 5% in 2 months or BMI 18.5-20.5 kg/m<sup>2</sup> with impaired  
27  
28 general condition or food intake 25-60% of the general condition; three  
29  
30 points for weight loss > 5% in 1 month or BMI less than 18.5 kg/m<sup>2</sup> with  
31  
32 impaired general condition or food intake reduced by 25% compared with  
33  
34 normal condition. Age score: one point for age ≥ 70 years. Nutritional  
35  
36 risk was assessed by summarizing the severity disease score, nutritional  
37  
38 score and the age score. Patients with total score < 3 are at no or low risk,  
39  
40 and with score ≥ 3 are at high risk.  
41  
42  
43  
44  
45  
46  
47  
48  
49

50 MUST is developed to assess the nutritional risk for adults [14]. It  
51  
52 consists of parameters of BMI, unintentional weight loss and any acute  
53  
54 disease which compromises nutritional intake for more than 5 days. The  
55  
56

1  
2  
3 three parameters are rated as 0, 1, or 2 as follows: BMI > 20 kg/m<sup>2</sup> = 0;  
4  
5 18.5-20 kg/m<sup>2</sup> = 1; < 18.5 kg/m<sup>2</sup> = 2; unintentional weight loss in the past  
6  
7 3-6 months < 5% = 0; 5-10% = 1; > 10% = 2; acute disease: absent = 0;  
8  
9 present = 2. Overall risk of malnutrition is assessed by adding all the  
10  
11 points together. 0 is at low risk; score 1 is at medium risk; and score 2 is  
12  
13 at high risk.  
14  
15  
16  
17

18 MNA-SF is the short form of MNA, and it is designed especially for  
19  
20 the elderly. It contains six questions selected from MNA.[15] These  
21  
22 questions are about BMI, recent weight loss, change of appetite, mobility,  
23  
24 psychological stress and neuropsychological problems. Each question is  
25  
26 rated from 0 to 2 or 3 and the total score of MNA-SF is 14. Patients with  
27  
28 12-14 points are at normal nutritional status. And patients with scores ≤  
29  
30 11 are at risk of malnutrition.  
31  
32  
33  
34

### 35 **Statistical analysis**

36  
37 Statistical analysis was performed using SPSS software version 23.0 for  
38  
39 windows. Normally distributed continuous variables were expressed as  
40  
41 mean values and standard deviations (SD), categorical variables were  
42  
43 presented as absolute and relative frequencies. Independent t test and the  
44  
45 Pearson  $\chi^2$  test (or Fisher's exact test) were applied to the appropriate  
46  
47 comparison of variables. All reported P-values were compared to a  
48  
49 significance level of 5% based on two-sided tests. To determine  
50  
51 diagnostic concordance between the three assessment tools and the new  
52  
53  
54  
55  
56  
57

1  
2  
3  
4 ESPEN diagnostic criteria for malnutrition, Cohen's kappa ( $\kappa$ ) statistic  
5  
6 was calculated. K coefficient reflects the consistency for qualitative  
7  
8 variables.  $K = 1$  means completely consistency between the variables.  
9  
10 And if there is no consistency among the variables then  $K \leq 0$ . Positive  
11  
12 likelihood ratios (LR+) and negative likelihood ratios (LR-) were  
13  
14 calculated for all three tools.  
15  
16

17  
18 Sensitivity and specificity values for the three nutritional screening  
19  
20 tools with the new ESPEN diagnostic criteria for malnutrition were  
21  
22 calculated. Receiver operating characteristic curves (ROC) of the three  
23  
24 screening tools were also used to evaluate the ability to accurately  
25  
26 distinguish the malnourished patients. Area under the ROC curve (AUC)  
27  
28 equal to 0.5 indicates that a tool has no diagnostic value, AUC equal to  
29  
30 0.5-0.7 indicates a tool has a low diagnostic value, AUC equal to 0.7-0.9  
31  
32 indicates a tool has a moderate diagnostic value, and AUC equal to 0.9-1  
33  
34 means a tool has a high diagnostic value.  
35  
36  
37  
38  
39

## 40 Results

41  
42 Two hundred and fifty five patients were enrolled in this study (103  
43  
44 patients underwent gastric cancer surgery and 152 patients underwent  
45  
46 colorectal cancer surgery). The characteristics of the sample were  
47  
48 presented in Table 1.  
49  
50

51  
52 **Table 1. Characteristics of the total patients.**

| Patient Characteristics  | Total (n=255) | GC (n=103) | CRC (n=152) | P value |
|--------------------------|---------------|------------|-------------|---------|
| Age <sup>a</sup> (years) | 76.5±4.8      | 76.1±4.6   | 76.8±4.9    | 0.318   |
| Sex <sup>b</sup>         |               |            |             |         |

|                                                                       |             |             |             |         |
|-----------------------------------------------------------------------|-------------|-------------|-------------|---------|
| Male                                                                  | 160(62.7%)  | 78(75.7%)   | 82(52.1%)   | <0.001* |
| Female                                                                | 95(37.3%)   | 25(24.3%)   | 70(47.9%)   |         |
| Height <sup>a</sup> (m)                                               | 1.61±0.08   | 1.61±0.07   | 1.60±0.09   | 0.269   |
| Weight <sup>a</sup> (kg)                                              | 59.20±10.73 | 59.67±10.26 | 58.90±11.07 | 0.597   |
| BMI <sup>a</sup> (kg/m <sup>2</sup> )                                 | 22.93±3.55  | 22.93±3.50  | 22.96±3.59  | 0.994   |
| BMI <sup>b</sup> (<18.5kg/m <sup>2</sup> )                            | 26(10.2%)   | 11(10.7%)   | 15(9.9%)    | 0.834   |
| Weight loss <sup>b</sup> (>5% in 3 months or >10% indefinite of time) | 74(29.0%)   | 31(30.1%)   | 43(28.3%)   | 0.755   |

BMI: body mass index. GC: gastric cancer. CRC: colorectal cancer. \*Statistically significance ( $p \leq 0.05$ ).

<sup>a</sup> Values expressed as mean  $\pm$  standard deviation(SD) .

<sup>b</sup> Values expressed as frequencies and percentages.

P values were determined with the use of independent t test and the Pearson $\chi^2$  test.

Table 2 listed the characteristics and anthropometric data of the patients summarized and stratified according to the nutritional status. There were no difference in age or sex between the two groups classified by the three screening tools and the new ESPEN criteria for malnutrition. However, the BMI and weight loss (> 5% in 3 months or > 10% indefinite of time) differed between the groups.

**Table 2. Characteristics and anthropometric data stratified by the nutrition status of total patients.**

|                                                                       | ESPEN criteria              |                        |         | NRS 2002                  |                      |         | MUST                |                              |         | MNA-SF             |                                 |         |
|-----------------------------------------------------------------------|-----------------------------|------------------------|---------|---------------------------|----------------------|---------|---------------------|------------------------------|---------|--------------------|---------------------------------|---------|
|                                                                       | Not malnourished<br>(n=204) | Malnourished<br>(n=51) | P value | No or Low risk<br>(n=122) | High risk<br>(n=133) | P value | Low risk<br>(n=159) | Moderate/High risk<br>(n=96) | P value | No risk<br>(n=133) | Risk of malnutrition<br>(n=122) | P value |
| Age <sup>a</sup> (years)                                              | 76.3±4.8                    | 77.4±4.9               | 0.148   | 75.9±4.5                  | 77.0±5.0             | 0.059   | 76.1±4.6            | 77.1±5.1                     | 0.097   | 76.0±4.6           | 77.0±5.0                        | 0.102   |
| Sex <sup>b</sup>                                                      |                             |                        |         |                           |                      |         |                     |                              |         |                    |                                 |         |
| male                                                                  | 124(60.8%)                  | 36(70.6%)              | 0.195   | 73(59.8%)                 | 87(65.4%)            | 0.357   | 101(63.5%)          | 59(61.5%)                    | 0.741   | 90(67.7%)          | 70(57.4%)                       | 0.089   |
| female                                                                | 80(39.2%)                   | 15(29.4%)              |         | 49(40.2%)                 | 46(34.6%)            |         | 58(36.5%)           | 37(38.5%)                    |         | 43(32.3%)          | 52(42.6%)                       |         |
| Height <sup>a</sup> (m)                                               | 1.60±0.08                   | 1.63±0.08              | 0.046*  | 1.60±0.08                 | 1.61±0.09            | 0.155   | 1.60±0.08           | 1.61±0.09                    | 0.511   | 1.61±0.08          | 1.60±0.08                       | 0.112   |
| Weight <sup>a</sup> (kg)                                              | 61.55±10.00                 | 49.80±8.17             | <0.001* | 60.23±10.04               | 58.26±11.29          | 0.142   | 62.46±9.55          | 53.80±10.45                  | <0.001* | 63.32±9.56         | 54.72±10.16                     | <0.001* |
| BMI <sup>a</sup> (kg/m <sup>2</sup> )                                 | 23.98±3.01                  | 18.76±2.20             | <0.001* | 23.56±3.27                | 22.36±3.70           | 0.006*  | 24.28±2.95          | 20.71±3.34                   | <0.001* | 24.30±2.98         | 21.45±3.52                      | <0.001* |
| BMI <sup>b</sup> (<18.5kg/m <sup>2</sup> )                            | 1(0.5%)                     | 25(49.0%)              | <0.001* | 4(3.3%)                   | 22(16.5%)            | 0.001*  | 1(0.6%)             | 25(26.0%)                    | <0.001* | 1(0.8%)            | 25(20.5%)                       | <0.001* |
| Weight loss <sup>b</sup> (>5% in 3 months or >10% indefinite of time) | 34(16.7%)                   | 40(78.4%)              | <0.001* | 4(3.3%)                   | 70(52.6%)            | <0.001* | 14(8.8%)            | 60(62.5%)                    | <0.001* | 4(3.0%)            | 70(57.4%)                       | <0.001* |

\*Statistically significance ( $p \leq 0.05$ ).

<sup>a</sup> Values expressed as mean ± standard deviation(SD) .

<sup>b</sup> Values expressed as frequencies and percentages.

P values were determined with the use of independent t test and the Pearson  $\chi^2$  test(or Fisher's exact test where appropriate). BMI: body mass index.

Among the patients, the prevalence of malnutrition was 20.0% when determined by the ESPEN criteria. Among patients who underwent curative gastrectomy, the prevalence of malnutrition was 22.3% when determined by the new ESPEN criteria. And among colorectal surgery patients, the prevalence of malnutrition was 18.4% when determined by the



1  
2  
3  
4  
5  
6  
7  
8  
9  
10  
11  
12  
13  
14  
15  
16  
17  
18  
19  
20  
21  
22  
23  
24  
25  
26  
27  
28  
29  
30  
31  
32  
33  
34  
35  
36  
37  
38  
39  
40  
41  
42  
43  
44  
45  
46  
47

new ESPEN criteria. The classification of nutritional risk according to the three screening tools were shown in Table 3.

**Table 3. Classification of the risk of malnutrition with the ESPEN criteria and the three screening tools.**

| Risk of malnutrition | Total              |                    |                    | GC (n=103)        |                   |                   | CRC (n=152)       |                    |                   |
|----------------------|--------------------|--------------------|--------------------|-------------------|-------------------|-------------------|-------------------|--------------------|-------------------|
|                      | NRS 2002           | MUST               | MNA-SF             | NRS 2002          | MUST              | MNA-SF            | NRS 2002          | MUST               | MNA-SF            |
| No/Low               | 47.8%<br>(122/255) | 62.4%<br>(159/255) | 52.2%<br>(133/255) | 47.6%<br>(49/103) | 54.4%<br>(56/103) | 56.3%<br>(58/103) | 48.0%<br>(73/152) | 67.8%<br>(103/152) | 49.3%<br>(75/152) |
| Moderate/High        | 52.2%<br>(133/255) | 37.6%<br>(96/255)  | 47.8%<br>(122/255) | 52.4%<br>(54/103) | 45.6%<br>(47/103) | 43.7%<br>(45/103) | 52.0%<br>(79/152) | 32.2%<br>(49/152)  | 50.7%<br>(77/152) |

GC: gastric cancer. CRC: colorectal cancer.

a Classification of malnutrition according to the ESPEN consensus definition of malnutrition.

Cross tabulation of the results of the three tools and the classification of malnutrition according to the ESPEN consensus definition of malnutrition can be found in Table 4.

**Table 4. Cross tabulation of the results of the three screening tools and the classification of malnutrition according to the ESPEN consensus definition of malnutrition.**

|               |                  | NRS 2002    |                    | MUST     |                    | MNA-SF  |      |
|---------------|------------------|-------------|--------------------|----------|--------------------|---------|------|
|               |                  | No/Low risk | Moderate/High risk | Low risk | Moderate/High risk | No risk | Risk |
| ESPE criteria | Not Malnourished | 118         | 86                 | 156      | 48                 | 130     | 74   |
|               | Malnourished     | 4           | 47                 | 3        | 48                 | 3       | 48   |

The consistency between the nutritional screening tools and the new ESPEN diagnostic criteria for malnutrition was different. Among the total patients, MUST and MNA had the same sensitivity (94.1%), and NRS 2002 had the lowest sensitivity (92.2%). Moreover, MUST had the highest specificity (76.5%) compared with NRS 2002 (57.8%) and MNA-SF (63.7%). MUST had the highest positive predictive value (50.0%) and the highest negative predictive value (98.1%).

In the total patients, MUST had the highest K value ( $K = 0.530$ ,  $p < 0.001$ ) compared with MNA-SF ( $K = 0.380$ ,  $p < 0.001$ ) and NRS 2002 ( $K = 0.312$ ,  $p < 0.001$ ). In the gastric group, MUST had the highest K value. In the colorectal group, MUST had a higher level of consistency ( $K = 0.576$ ,  $p < 0.001$ ) compared with the fair consistencies in NRS 2002 ( $K = 0.243$ ,  $p < 0.001$ ) and MNA-SF ( $K = 0.361$ ,  $p < 0.001$ ). Finally, the area under the curve (AUC) calculated by the ROC indicated that all three screening tools had a moderate level of diagnostic value to distinguish a malnourished patient (AUC of NRS 2002, MUST and MNA-SF were found to be 0.750, 0.853 and 0.789, respectively). Results are presented in details in Table 5.

**Table 5. Statistical evaluation of the malnutrition screening tools compared with the diagnostic criteria of the ESPEN consensus.**

|                 | Total    |      |        | GC       |      |        | CRC      |      |        |
|-----------------|----------|------|--------|----------|------|--------|----------|------|--------|
|                 | NRS 2002 | MUST | MNA-SF | NRS 2002 | MUST | MNA-SF | NRS 2002 | MUST | MNA-SF |
| Sensitivity (%) | 92.2     | 94.1 | 94.1   | 100.0    | 95.7 | 87.0   | 85.7     | 92.9 | 100.0  |

1  
2  
3  
4  
5  
6  
7  
8  
9  
10  
11  
12  
13  
14  
15  
16  
17  
18  
19  
20  
21  
22  
23  
24  
25  
26  
27  
28  
29  
30  
31  
32  
33  
34  
35  
36  
37  
38  
39  
40  
41  
42  
43  
44  
45  
46  
47

|                                 |               |               |               |               |               |               |               |               |               |
|---------------------------------|---------------|---------------|---------------|---------------|---------------|---------------|---------------|---------------|---------------|
| Specificity (%)                 | 57.8          | 76.5          | 63.7          | 61.3          | 68.8          | 68.8          | 55.6          | 81.5          | 60.5          |
| Positive predictive value (%)   | 35.3          | 50.0          | 39.3          | 42.6          | 46.8          | 44.4          | 30.4          | 53.1          | 36.4          |
| Negative predictive value (%)   | 96.7          | 98.1          | 97.7          | 100.0         | 98.2          | 94.8          | 94.5          | 98.1          | 100.0         |
| Positive likelihood ratio (LR+) | 2.18          | 4.00          | 2.59          | 2.61          | 3.06          | 2.78          | 1.93          | 5.02          | 2.53          |
| Negative likelihood ratio (LR-) | 0.13          | 0.08          | 0.09          | 0.00          | 0.06          | 0.19          | 0.26          | 0.09          | 0.00          |
| K value (p)                     | 0.312(<0.001) | 0.530(<0.001) | 0.380(<0.001) | 0.414(<0.001) | 0.469(<0.001) | 0.415(<0.001) | 0.243(<0.001) | 0.576(<0.001) | 0.361(<0.001) |
| AUC                             | 0.750         | 0.853         | 0.789         | 0.806         | 0.822         | 0.779         | 0.707         | 0.872         | 0.802         |

GC: gastric cancer. CRC: colorectal cancer.  
 K value derived from Cohen kappa statistics.  
 AUC: Area under the curve from ROC.

## Discussion

This study is the first to apply the new ESPEN diagnostic criteria to the specific population of elderly gastrointestinal cancer patients, and 20.0% of the patients were classified as malnourished according to the new ESPEN diagnostic criteria for malnutrition. Another previous study has investigated the prevalence of malnutrition diagnosed by the new ESPEN criteria in four diverse populations.[19] In that study, 0.5% of the healthy elderly individuals and 6% of the geriatric outpatients were identified as malnourished. It is significantly lower compared with that of our study, which indicated that patients with gastrointestinal cancer might have a higher prevalence of malnutrition. The difference in the malnutrition rates also indicated that we should put emphasis on the requirement to assess the nutritional risk of the hospitalized elderly gastrointestinal cancer patients.

In the present study, 52.2% and 37.6% of the patients were found to be at moderate or high risk of malnutrition according to NRS 2002 and MUST respectively. With the MNA-SF, 47.8% of the patients were found to be at a risk of malnutrition. The various prevalence of the risk of malnutrition can result from the differences between the nutritional screening tools. In our study, MUST had the greatest K value compared with the NRS 2002 and MNA-SF. It showed that a greater proportion of the elderly patients with gastrointestinal cancer who were distinguished to

1  
2  
3 be at moderate or high risk of malnutrition with MUST could be  
4 identified as malnourished according to the ESPEN diagnostic criteria. In  
5  
6 other words, MUST can perform the best to detect the specific  
7  
8 malnourished individuals diagnosed by the new ESPEN criteria,  
9  
10 compared with NRS 2002 and MNA-SF. Furthermore, MUST has the  
11  
12 greatest AUC compared with NRS 2002 and MNA-SF in our study.  
13  
14  
15  
16  
17

18 Many previous studies compared the three nutritional screening tools  
19  
20 in specific populations. Poulia et al. evaluated the efficacy of six  
21  
22 nutritional screening tools in the elderly.[20] In Poulia's study, NRS 2002  
23  
24 was found to overestimate nutritional risk, MNA-SF was proven to have a  
25  
26 great validity, and MUST was found to have the best validity and the  
27  
28 greatest consistency. Another study by Myoungha et al.[21] evaluated five  
29  
30 nutritional screening tools, and suggested that MNA-SF overestimated  
31  
32 the nutritional risk in the elderly, and NRS 2002 performed better than  
33  
34 MNA-SF. However, MUST was also found to be the most efficient and  
35  
36 useful screening tool in this study. Both the previous studies compared  
37  
38 the screening tools with a combined index suggested by Pablo et al.,[22]  
39  
40 and they confirmed our results for the best performance of MUST  
41  
42 compared with NRS 2002 and MNA-SF. While Donini et al. developed a  
43  
44 study for the nutritional evaluation of the elderly nursing home  
45  
46 residents[23] and found that MNA-SF presented a higher predictive value  
47  
48 compared with NRS 2002 and MUST. However, in the study by Donini et  
49  
50  
51  
52  
53  
54  
55  
56  
57  
58  
59  
60

1  
2  
3 al., MNA was taken as the reference standard, which might induce an  
4 underpowered result. A previous study used the new ESPEN diagnostic  
5 criteria for malnutrition as a reference standard to compare nutritional  
6 screening tools.[24] However, MNA-SF was not included in this study,  
7 and the participators were not merely the elderly.  
8  
9

10  
11 The results of the comparison among NRS 2002, MUST and  
12 MNA-SF showed different efficiency of the three screening tools in our  
13 study. There might be an explanation for the differences. The original  
14 designs of the three nutritional screening tools were different. NRS 2002  
15 was developed to determine who needs nutritional supporting and it  
16 might distinguish an increased number of patients to be at high risk of  
17 malnutrition. According to the diagnosis criteria of NRS 2002, 1 score  
18 was added to patients aged  $\geq 70$  years, it might contribute to the higher  
19 prevalence of patients at nutritional risk diagnosed by NRS 2002.  
20 However, MUST was a screening tool to identify adults who are at risk of  
21 malnutrition. MNA-SF, the short form of MNA, was developed as a quick  
22 and easy nutritional screening tool and was used for primary screening  
23 before further assessment. The different results between our study and  
24 others can be attributed to the different populations and reference  
25 standards, just as what Ma et al. had mentioned in their review.[25]  
26  
27  
28  
29  
30  
31  
32  
33  
34  
35  
36  
37  
38  
39  
40  
41  
42  
43  
44  
45  
46  
47  
48  
49  
50  
51

52 Moreover, in our study, we evaluated the adequacy of the nutritional  
53 screening tools in the gastric cancer patients and the colorectal cancer  
54  
55  
56

1  
2  
3 patients, respectively. In the gastric cancer population, NRS 2002, MUST  
4 and MNA-SF all had a same moderate level of consistency with the new  
5  
6 ESPEN diagnostic criteria for malnutrition ( $K = 0.414$  for NRS 2002,  
7  
8  
9  
10  
11  
12  
13  
14  
15  
16  
17  
18  
19  
20  
21  
22  
23  
24  
25  
26  
27  
28  
29  
30  
31  
32  
33  
34  
35  
36  
37  
38  
39  
40  
41  
42  
43  
44  
45  
46  
47  
48  
49  
50  
51  
52  
53  
54  
55  
56  
57  
58  
59  
60

patients, respectively. In the gastric cancer population, NRS 2002, MUST and MNA-SF all had a same moderate level of consistency with the new ESPEN diagnostic criteria for malnutrition ( $K = 0.414$  for NRS 2002, 0.469 for MUST and 0.415 for MNA-SF, respectively). While in the colorectal population, MUST had the highest level of consistency ( $K = 0.576$ ) compared with the fair level of consistency of NRS 2002 ( $K = 0.243$ ) and MNA-SF ( $K = 0.361$ ). Based on the result, we concluded that MUST could perform the best in the specific colorectal cancer patients. Further studies are needed to confirm our conclusion.

It is of great significance to improve the nutritional status of the elderly patients with gastrointestinal cancer if they are malnourished or at risk of malnutrition. As the first step to identify who are malnourished or at risk of malnutrition, nutritional screening should be reliable and easy to perform. To the best of our knowledge, this is the first study to compare the three nutritional screening tools in the specific geriatric gastrointestinal cancer population. Our study suggested that MUST is the best choice in the three common nutritional screening tools. For the accuracy and simplicity of MUST, both the patients and surgeons will benefit from it. Furthermore, in our study, though there were some differences in sensitivity and specificity, the three tools were found to have a same level of consistency in the gastric cancer population. While in the colorectal cancer population, MUST had the highest level of

1  
2  
3 consistency compared with the others( $K = 0.576$ ). MUST also had the  
4  
5 significant highest specificity, positive predictive value, and the greatest  
6  
7 AUC. It indicated that we can choose one of three nutritional screening  
8  
9 tools when assessing nutritional risk among the elderly patients with  
10  
11 gastric cancer. However, when assessing nutritional risk among the  
12  
13 elderly patients with colorectal cancer, MUST is the only choice for the  
14  
15 highest accuracy.  
16  
17  
18  
19

20  
21 The ESPEN guideline used to promote NRS 2002 as a tool to screen  
22  
23 hospitalized patients. While with the results of this study, MUST was  
24  
25 found to be better to screen gastrointestinal cancer patients. This may  
26  
27 result from several aspects. MUST was developed as a valid tool to  
28  
29 identify nutritional risk of specific patients population, and it is the  
30  
31 unique tool that was designed for screening of malnutrition.[26]  
32  
33 Therefore, MUST might perform best according to the ESPEN diagnostic  
34  
35 criteria for malnutrition. Moreover, MUST has straight forward and  
36  
37 objective questions, with which is easier to be performed. It can be a  
38  
39 useful nutritional screening tool when there is no redundant time and no  
40  
41 professional medical staff.  
42  
43  
44  
45  
46

47  
48 It is well-known that malnourished patients or patients at risk of  
49  
50 malnutrition would have a poor clinical outcome. Therefore, it is of great  
51  
52 significance to improve the nutritional status of these patients. The  
53  
54 indices of these three screening tools have common characteristics. With  
55  
56  
57



1  
2  
3 the results of our study, the parameters of MUST suggest that we could  
4  
5 intervene malnutrition by improving BMI, avoiding weight loss and  
6  
7 curing the acute disease. In fact, this is partly similar with the parameters  
8  
9 of EPSEN diagnostic criteria, NRS 2002 and MNA-SF. It means that if  
10  
11 the result of MUST was improved, the consequence of EPSEN diagnostic  
12  
13 criteria and other screening tools would also be improved. Further studies  
14  
15 should be developed to investigate implications of the intervention for  
16  
17 malnutrition.  
18  
19  
20  
21  
22

23 The present study has some limitations. Firstly, the sample size is  
24  
25 relatively small. However, this study was conducted in two centers with  
26  
27 large surgical volume. So we believe that the data in our study are more  
28  
29 representative. To a certain extent, it overcame the smallness of the  
30  
31 sample size. Secondly, according to the new ESPEN diagnostic criteria  
32  
33 for malnutrition, malnutrition can also be diagnosed by unintentional  
34  
35 weight loss combined with reduced fat free mass index (FFMI). So  
36  
37 another limitation of our study is the lack of data for fat free mass index.  
38  
39 However, the measurement of FFMI requires specific equipment and  
40  
41 extra costs. Moreover, Trummer et al. found that low BMI and low FFMI  
42  
43 were closely correlative.[27] In that study, FFMI less than 17 kg/m<sup>2</sup> for  
44  
45 men and less than 15 kg/m<sup>2</sup> for womFen were roughly equivalent to BMI  
46  
47 less than 18.5 kg/m<sup>2</sup> after determining the FFM levels.  
48  
49  
50  
51  
52  
53

## 54 **Conclusions**

1  
2  
3  
4 To our knowledge, this is the first study to compare the three  
5  
6 malnutrition screening tools (NRS 2002, MUST and MNA-SF) with the  
7  
8 new ESPEN diagnostic criteria for malnutrition, and it is also the first  
9  
10 study to evaluate the three screening tools in the specific geriatric  
11  
12 gastrointestinal cancer patients. The prevalence of malnutrition was 20.0%  
13  
14 with the ESPEN diagnostic criteria for malnutrition for patients with  
15  
16 gastrointestinal cancer in the present study. MUST was found to perform  
17  
18 the best to identify the malnourished elderly gastrointestinal cancer  
19  
20 patients distinguished by the new ESPEN diagnostic criteria for  
21  
22 malnutrition. Nevertheless, further studies are needed to verify our  
23  
24 findings.  
25  
26  
27  
28  
29  
30  
31  
32

## 33 **References**

- 34  
35 1. Hurria A, Gupta S, Zauderer M, et al. Developing a cancer-specific  
36  
37 geriatric assessment: a feasibility study. *Cancer* 2005;104:1998-2005.  
38  
39 doi:10.1002/cncr.21422.  
40  
41
- 42  
43 2. Balducci L, Extermann M. Cancer and aging. An evolving panorama.  
44  
45 *Hematology/oncology Clinics of North America* 2000;14:1-16.  
46  
47
- 48  
49 3. Marugame T, Dongmei Q. Comparison of Time Trends in Stomach  
50  
51 Cancer Incidence (1973–1997) in East Asia, Europe and USA, from  
52  
53 *Cancer Incidence in Five Continents Vol. IV–VIII. Jpn J Clin Oncol.*  
54  
55 2007;37:242-3. doi:10.1093/jjco/hym014.  
56  
57

- 1  
2  
3  
4 4. Biondi A, Vacante M, Ambrosino I, et al. Role of surgery for  
5  
6 colorectal cancer in the elderly. *World Journal of Gastrointestinal*  
7  
8 *Surgery* 2011;8:606-13. doi:10.4240/wjgs.v8.i9.606  
9
- 10  
11 5. Takeshita H, Ichikawa D, Komatsu S, et al. Surgical outcomes of  
12  
13 gastrectomy for elderly patients with gastric cancer. *World Journal of*  
14  
15 *Surgery* 2013;37:2891-8. doi: 10.1007/s00268-013-2210-7.  
16  
17
- 18  
19 6. Simmonds PD, Best L, George S, et al. Surgery for colorectal cancer  
20  
21 in elderly patients: a systematic review. *Lancet* 2000;356:968-74.  
22  
23 doi:http://dx.doi.org/10.1016/S0140-6736(00)02713-6.  
24
- 25  
26 7. Heriot AG, Tekkis PP, Smith JJ, et al. Prediction of postoperative  
27  
28 mortality in elderly patients with colorectal cancer. *Diseases of the*  
29  
30 *Colon & Rectum* 2006;49:816-24. doi: 10.1007/s10350-006-0523-4.  
31  
32
- 33  
34 8. Audisio RA, Balch CM. Why Can't Surgeons Treat Older Patients the  
35  
36 Same as Younger Patients? *Annals of Surgical Oncology*  
37  
38 2016;23:4123-5. doi:10.1245/s10434-016-5459-x.  
39
- 40  
41 9. Brownie S. Why are elderly individuals at risk of nutritional  
42  
43 deficiency? *International Journal of Nursing Practice* 2006, 12:110-8.  
44  
45 doi:10.1111/j.1440-172X.2006.00557.x.  
46
- 47  
48 10. Bozzetti F. Why the oncologist should consider the nutritional status  
49  
50 of the elderly cancer patient. *Nutrition* 2015;31:590-3.  
51  
52 doi:10.1016/j.nut.2014.12.005.  
53
- 54  
55 11. Martucci RB, Barbosa MV, D'Almeida CA, et al. Undernutrition as  
56

- 1  
2  
3 independent predictor of early mortality in elderly cancer patients.  
4  
5  
6 Nutrition 2017;34:65-70. doi:10.1016/j.nut.2016.09.011.  
7
- 8  
9 12. Kondrup J, Allison SP, Elia M, et al. ESPEN guidelines for nutrition  
10 screening 2002. Clinical Nutrition 2003;22:415-21.  
11  
12 doi:10.1016/S0261-5614(03)00098-0.  
13  
14
- 15  
16 13. Hamberg O. Nutritional risk screening (NRS 2002): a new method  
17 based on an analysis of controlled clinical trials. Clinical Nutrition  
18 2003;22:321-36. doi:10.1016/S0261-5614(02)00214-5.  
19  
20  
21
- 22  
23 14. Elia M. The 'MUST' report. Nutritional screening for adults: a  
24 multidisciplinary responsibility. Development and use of the  
25 'Malnutrition Universal Screening Tool' (MUST) for adults. British  
26 Association for Parenteral and Enteral Nutrition (BAPEN) 2003.  
27  
28  
29  
30  
31
- 32  
33 15. Rubenstein LZ, Harker JO, Salvà A, et al. Screening for  
34 undernutrition in geriatric practice: developing the short-form  
35 mini-nutritional assessment (MNA-SF). Journals of Gerontology  
36 2001;56:M366-72.  
37  
38  
39  
40  
41
- 42  
43 16. Cederholm T, Bosaeus I, Barazzoni R, et al. Diagnostic criteria for  
44 malnutrition - An ESPEN Consensus Statement. Clinical Nutrition  
45 2015;139:335-40. doi:10.1016/j.clnu.2015.03.001.  
46  
47  
48  
49
- 50  
51 17. Guerra RS, Fonseca I, Sousa AS, et al. ESPEN diagnostic criteria for  
52 malnutrition – A validation study in hospitalized patients. Clinical  
53 Nutrition 2016 [Epub ahead of print] doi:10.1016/j.clnu.2016.08.022.  
54  
55  
56

- 1  
2  
3  
4 18. Rondel AL, Langius JA, de van der Schueren MA, et al. The new  
5  
6 ESPEN diagnostic criteria for malnutrition predict overall survival in  
7  
8 hospitalised patients. *Clinical Nutrition* 2016 [Epub ahead of print]  
9  
10 doi:10.1016/j.clnu.2016.11.018.  
11  
12  
13 19. Rojer AG, Kruijenga HM, Trappenburg MC, et al. The prevalence of  
14  
15 malnutrition according to the new ESPEN definition in four diverse  
16  
17 populations. *Clinical Nutrition* 2015;35:758-62.  
18  
19 doi:10.1016/j.clnu.2015.06.005.  
20  
21  
22  
23 20. Poulia KA, Yannakoulia M, Karageorgou D, et al. Evaluation of the  
24  
25 efficacy of six nutritional screening tools to predict malnutrition in the  
26  
27 elderly. *Clinical Nutrition* 2012;31:378-85.  
28  
29 doi:10.1016/j.clnu.2011.11.017.  
30  
31  
32  
33 21. Myoungba B, Youngran H. Evaluation of the efficacy of nutritional  
34  
35 screening tools to predict malnutrition in the elderly at a geriatric care  
36  
37 hospital. *Nutrition Research & Practice* 2015;9:637-43.  
38  
39 doi:10.4162/nrp.2015.9.6.637.  
40  
41  
42  
43 22. Pablo AM, Izaga MA, Alday LA. Assessment of nutritional status on  
44  
45 hospital admission: nutritional scores. *European Journal of Clinical*  
46  
47 *Nutrition* 2003;57:824-31. doi:10.1038/sj.ejcn.1601616.  
48  
49  
50 23. Donini LM, Poggiogalle E, Molfino A, et al. Mini-Nutritional  
51  
52 Assessment, Malnutrition Universal Screening Tool, and Nutrition  
53  
54 Risk Screening Tool for the Nutritional Evaluation of Older Nursing  
55  
56

- 1  
2  
3 Home Residents. *J Am Med Dir Assoc* 2016;17:959.e11-8.  
4  
5 doi:10.1016/j.jamda.2016.06.028.  
6  
7  
8  
9 24. Poulia KA, Klek S, Doundoulakis I, et al. The two most popular  
10  
11 malnutrition screening tools in the light of the new ESPEN consensus  
12  
13 definition of the diagnostic criteria for malnutrition. *Clinical Nutrition*  
14  
15 2017;36:1130-5. doi:10.1016/j.clnu.2016.07.014.  
16  
17  
18 25. van Bokhorst-de van der Schueren MA, Guaitoli PR, Jansma EP, et al.  
19  
20 Nutrition screening tools: does one size fit all? A systematic review of  
21  
22 screening tools for the hospital setting. *Clinical Nutrition*  
23  
24 2014;33:39-58. doi:10.1016/j.clnu.2013.04.008.  
25  
26  
27  
28 26. Stratton RJ, Hackston A, Longmore D, et al. Malnutrition in hospital  
29  
30 outpatients and inpatients: prevalence, concurrent validity and ease of  
31  
32 use of the 'malnutrition universal screening tool' ('MUST') for adults.  
33  
34 *British Journal of Nutrition* 2004;92:799-808.  
35  
36  
37  
38 27. Bahadori B, Uitz E, Tonninger-Bahadori K, et al. Body composition:  
39  
40 the fat-free mass index (FFMI) and the body fat mass index (BFMI)  
41  
42 distribution among the adult Austrian population-results of a cross-  
43  
44 sectional pilot study. *International Journal of Body Composition*  
45  
46 *Research* 2006;4:123-8.  
47  
48  
49  
50  
51

52 **Contributors:** Xiao-Jun Ye and Yan-Bin Ji are joint first authors. Zhen  
53  
54 Yu, Cheng-Le Zhuang, and Xian Shen designed the study. Bing-Wei Ma  
55  
56

1  
2  
3 and Wei-Zhe Chen collected the data. Dong-Dong Huang and Zong-You  
4  
5 Pan analyzed the data. Xiao-Jun Ye and Yan-Bin Ji drafted the  
6  
7 manuscript. Zhen Yu and Cheng-Le Zhuang approved the final version of  
8  
9 the manuscript. All authors have read and approved the final manuscript.  
10  
11  
12

13 **Data sharing statement:** No additional unpublished data are available.  
14  
15  
16  
17  
18  
19  
20  
21  
22  
23  
24  
25  
26  
27  
28  
29  
30  
31  
32  
33  
34  
35  
36  
37  
38  
39  
40  
41  
42  
43  
44  
45  
46  
47  
48  
49  
50  
51  
52  
53  
54  
55  
56  
57  
58  
59  
60

| Section & Topic   | No. | Item                                                                                                                                                   | Page     |
|-------------------|-----|--------------------------------------------------------------------------------------------------------------------------------------------------------|----------|
| Title or Abstract |     |                                                                                                                                                        |          |
|                   | 1   | Identification as a study of diagnostic accuracy using at least one measure of accuracy (such as sensitivity, specificity, predictive values, or AUC)  | 3        |
| Abstract          |     |                                                                                                                                                        |          |
|                   | 2   | Structured summary of study design, methods, results, and conclusions (for specific guidance, see STARD for Abstracts)                                 | 3        |
| Introduction      |     |                                                                                                                                                        |          |
|                   | 3   | Scientific and clinical background, including the intended use and clinical role of the index test                                                     | 5        |
|                   | 4   | Study objectives and hypotheses                                                                                                                        | 6        |
| Methods           |     |                                                                                                                                                        |          |
| Study Design      | 5   | Whether data collection was planned before the index test and reference standard were performed (prospective study) or after (retrospective study)     | 6        |
| Participants      | 6   | Eligibility criteria                                                                                                                                   | 6        |
|                   | 7   | On what basis potentially eligible participants were identified (such as symptoms, results from previous tests, inclusion in registry)                 | 6        |
|                   | 8   | Where and when potentially eligible participants were identified (setting, location and dates)                                                         | 6        |
|                   | 9   | Whether participants formed a consecutive, random or convenience series                                                                                | 6        |
| Test method       | 10a | Index test, in sufficient detail to allow replication                                                                                                  | 7,8,9,10 |
|                   | 10b | Reference standard, in sufficient detail to allow replication                                                                                          | 7,8,9,10 |
|                   | 11  | Rationale for choosing the reference standard (if alternatives exist)                                                                                  | 7,8,9,10 |
|                   | 12a | Definition of and rationale for test positivity cut-offs or result categories of the index test, distinguishing pre-specified from exploratory         | 7,8,9,10 |
|                   | 12b | Definition of and rationale for test positivity cut-offs or result categories of the reference standard, distinguishing pre-specified from exploratory | 7,8,9,10 |
|                   | 13a | Whether clinical information and reference standard results were available to the performers/readers of the index test                                 | 7        |
|                   | 13b | Whether clinical information and index test results were available to the assessors of the reference standard                                          | 7        |
| Analysis          | 14  | Methods for estimating or comparing measures of diagnostic accuracy                                                                                    | 9,10     |
|                   | 15  | How indeterminate index test or reference standard results were handled                                                                                | 9,10     |
|                   | 16  | How missing data on the index test and reference standard were handled                                                                                 | 6        |
|                   | 17  | Any analyses of variability in diagnostic accuracy, distinguishing pre-specified from exploratory                                                      | 9,10     |
|                   | 18  | Intended sample size and how it was determined                                                                                                         | 6        |
| Results           |     |                                                                                                                                                        |          |
| Participants      | 19  | Flow of participants, using a diagram                                                                                                                  | 10       |
|                   | 20  | Baseline demographic and clinical characteristics of participants                                                                                      | 10       |
|                   | 21a | Distribution of severity of disease in those with the target condition                                                                                 | 12       |
|                   | 21b | Distribution of alternative diagnoses in those without the target condition                                                                            | 12       |
|                   | 22  | Time interval and any clinical interventions between index test and reference standard                                                                 | 13       |
| The Results       | 23  | Cross tabulation of the index test results (or their distribution) by the results of the reference standard                                            | 14       |
|                   | 24  | Estimates of diagnostic accuracy and their precision (such as 95% confidence intervals)                                                                | 15       |
|                   | 25  | Any adverse events from performing the index test or the reference standard                                                                            | 15       |
| Discussion        |     |                                                                                                                                                        |          |
|                   | 26  | Study limitations, including sources of potential bias, statistical uncertainty, and generalisability                                                  | 21       |



1  
2  
3  
4  
5  
6  
7  
8  
9  
10  
11  
12  
13  
14  
15  
16  
17  
18  
19  
20  
21  
22  
23  
24  
25  
26  
27  
28  
29  
30  
31  
32  
33  
34  
35  
36  
37  
38  
39  
40  
41  
42  
43  
44  
45  
46  
47  
48  
49  
50  
51  
52  
53  
54  
55  
56  
57  
58  
59  
60

|                   |    |                                                                                           |       |
|-------------------|----|-------------------------------------------------------------------------------------------|-------|
|                   | 27 | Implications for practice, including the intended use and clinical role of the index test | 19,20 |
| Other Information |    |                                                                                           |       |
|                   | 28 | Registration number and name of registry                                                  | 2     |
|                   | 29 | Where the full study protocol can be accessed                                             | 6     |
|                   | 30 | Sources of funding and other support; role of funders                                     | 2     |

For peer review only
